# Supplementary material
Source: PubMed Central journal article supplement (PMC3986158)
Supplement: 1319900111_sapp.pdf [file 1319900111_sapp.pdf]

# Small Cationic Antimicrobial Peptides Delocalize Peripheral Membrane Proteins

Michaela Wenzel<sup>a</sup>, Alina Iulia Chiriac<sup>b</sup>, Andreas Otto<sup>c</sup>, Dagmar Zweytick<sup>d</sup>, Caroline May<sup>e</sup>,  
Catherine Schumacher<sup>f</sup>, Ronald Gust<sup>g</sup>, H. Bauke Albada<sup>h</sup>, Maya Penkova<sup>h</sup>, Ute Krämer<sup>i</sup>,  
Ralf Erdmann<sup>j</sup>, Nils Metzler-Nolte<sup>h</sup>, Suzana K. Straus<sup>k</sup>, Erhard Bremer<sup>l</sup>, Dörte Becher<sup>c</sup>,  
Heike Brötz-Oesterhelt<sup>f</sup>, Hans-Georg Sahl<sup>b</sup>, Julia E. Bandow<sup>a1</sup>

<sup>a</sup>*Biology of Microorganisms, Ruhr University Bochum, Bochum, Germany*

<sup>b</sup>*Institute for Medical Microbiology, Immunology, and Parasitology, Pharmaceutical Microbiology Section,  
University of Bonn, Bonn, Germany*

<sup>c</sup>*Microbial Physiology and Molecular Biology, Ernst Moritz Arndt University, Greifswald, Germany*

<sup>d</sup>*Institute of Molecular Biosciences, Biophysics Division, University of Graz, Graz, Austria*

<sup>e</sup>*Immune Proteomics, Medical Proteome Center, Ruhr University Bochum, Bochum, Germany*

<sup>f</sup>*Institute for Pharmaceutical Biology and Biotechnology, Heinrich Heine University, Düsseldorf, Germany*

<sup>g</sup>*Department of Pharmaceutical Chemistry, University of Innsbruck, Austria*

<sup>h</sup>*Bioinorganic Chemistry, Ruhr University Bochum, Bochum, Germany*

<sup>i</sup>*Plant Physiology, Ruhr University Bochum, Bochum, Germany*

<sup>j</sup>*Institute of Physiological Chemistry, Ruhr University Bochum, Bochum, Germany*

<sup>k</sup>*Department of Chemistry, University of British Columbia, Vancouver, Canada*

<sup>l</sup>*Department of Biology, University of Marburg, Marburg, Germany*

## SI Appendix

### Content

|             |                                                            |                |
|-------------|------------------------------------------------------------|----------------|
| <b>i)</b>   | <b>Experimental details</b>                                | <b>Page 2</b>  |
| <b>ii)</b>  | <b>Results of the comparative proteome analysis</b>        | <b>Page 17</b> |
| <b>iii)</b> | <b>Results of cell wall biosynthesis inhibition assays</b> | <b>Page 20</b> |
| <b>iv)</b>  | <b>References</b>                                          | <b>Page 20</b> |
| <b>v)</b>   | <b>SI Tables</b>                                           | <b>Page 23</b> |
| <b>vi)</b>  | <b>SI Figures</b>                                          | <b>Page 38</b> |

## i) Experimental details

### Antibiotics

Antibiotic stock solutions of 10 mg/ml were prepared in sterile DMSO (MP196, D-MP196, MP276, valinomycin, gramicidin A, gramicidin S, vancomycin), sterile double-distilled water (aurein 2.2), or 0.01 M HCl (nisin). MP276, L- and D-MP196 were synthesized by solid-phase synthesis as described previously (1) (see **SI Appendix, Fig. S1** for structures). Nisin was purified according to Bonelli *et al.* (2). Valinomycin, gramicidin A, and vancomycin were purchased from Sigma-Aldrich (St Louis, MO, USA). Gramicidin S was synthesized according to Wadwhani *et al.* (3). Aurein 2.2 was synthesized as described by Pan *et al.* (4). Lactoferrin, rotenone, and antimycin A were purchased from Sigma-Aldrich. Stock solutions were prepared in sterile double-distilled water (lactoferrin, 1 mM), acetone (rotenone, 100 mM), or ethanol (antimycin A, 10 mM). Sublethal antibiotic concentrations applied in the single experiments were adjusted to the respective bacterial strains and experimental conditions, aiming at adequate bacterial growth inhibition (reduction of the growth rate by 50-70%) without killing the cells or abolishing their metabolic activity completely (see **SI Appendix, Fig. S2**).

### Radioactive precursor incorporation assay

Influence of MP196 on major metabolic pathways was studied by incorporation of radioactively labeled precursor molecules into *Staphylococcus simulans* 22 as described by Schneider *et al.* (5). (<sup>14</sup>C)-thymidine was used for monitoring DNA, 5-(<sup>3</sup>H)-uridine for RNA, L-(<sup>14</sup>C)-isoleucine for protein, and (<sup>3</sup>H)-glucosamine-hydrochloride for cell wall biosynthesis inhibition, respectively. Cells were grown in half-concentrated Mueller Hinton broth (Henceforth MH, Oxoid, Basingstoke, United Kingdom) at 37 °C until reaching an optical density at 600 nm (OD<sub>600</sub>) of 0.5 and diluted to an OD<sub>600</sub> of 0.1 to 0.2. Newly synthesized DNA, RNA, protein or peptidoglycane was radioactively labeled by addition of the respective precursors to a final concentration of 5.55 kBq/mL (<sup>14</sup>C)-thymidine, 37 kBq/mL 5-(<sup>3</sup>H)-uridine, 5.55 kBq/mL L-(<sup>14</sup>C)-isoleucine, and 37 kBq/mL (<sup>3</sup>H)-glucosamine-hydrochloride. After 15 min ((<sup>14</sup>C)-thymidine, 5-(<sup>3</sup>H)-uridine, L-(<sup>14</sup>C)-isoleucine) or 30 min ((<sup>3</sup>H)-glucosamine-hydrochloride) of radioactive incorporation, subcultures of the differentially labeled samples were treated with 2 µg/ml MP196, 0.7

µg/ml ciprofloxacin, 0.07 µg/ml rifampicin, 0.7 µg/ml tetracycline, and 0.7 µg/ml vancomycin, respectively, or left untreated as negative controls. Samples of 200 µl were collected at 0, 10, 20, and 30 min after antibiotic addition, mixed with ice-cold trichloroacetic acid (TCA) precipitation buffer (10% TCA, 1 M NaCl), incubated on ice for 30 min, and filtered through glass microfibre filters (Whatman, GE Healthcare, Uppsala, Sweden). Filters were subsequently washed with 5 ml washing buffer (2.5% TCA, 1 M NaCl), dried, and transferred to counting vials. 5 ml of scintillation fluid (Filtersafe, Zinsser, Frankfurt, Germany) were added and radioactivity was measured in counts per minute (CPM) using a TriCarb 3110TR liquid scintillation analyzer (Perkin Elmer, Waltham, MA, USA).

### **Reporter gene assay**

For quantitative expression analysis of selected marker genes, five bacterial reporter strains were used, carrying the promoter of either *yorB*, *bmrC* (synonym *yhel*), *helD* (synonym *yvgS*), *ypuA* or *lial* (synonym *yvql*) fused to the firefly luciferase reporter gene in the genetic background of *B. subtilis* IS34 (6). Reporter strains were cultured overnight in lysogeny broth with 5 µg/ml erythromycin (resistance marker on the luciferase plasmid) at 37 °C and 200 rpm. Cultures were diluted to OD<sub>600</sub> of 0.05 in 20 ml of either Belitzky minimal medium (BMM) (7) (*bmrC* strain) or lysogeny broth (all other strains) with 5 µg/ml erythromycin, grown to an OD<sub>600</sub> of 0.4 (*bmrC* strain) or 0.9 (all other strains) and diluted to an OD<sub>600</sub> of 0.02. Serial twofold dilutions of MP196 (0.031 to 64 µg/ml) in 60 µl lysogeny broth or BMM were prepared in white 96-well flat bottom polystyrol microtiter plates (Greiner, Frickenhausen, Germany) and were inoculated with 60 µl of the adjusted bacterial suspension. Plates were incubated at 37 °C for a predetermined time period depending on the induction kinetics of the reporter strain: 1 h for the *lial* and *ypuA* strains, 1.5 h for the *helD* strain, 3.5 h for the *yorB* strain and 4 h for the *bmrC* strain. Then 60 µl citrate buffer (0.1 M, pH 5) containing 2 mM luciferin (Serva, Heidelberg, Germany) was added and flash luminescence was measured using a microtiter plate reader (infinite M200, Tecan, Männedorf, Switzerland).

## **Proteome analysis**

### Bacterial strains and growth conditions

*Bacillus subtilis* 168 (*trpC2*) (8) was grown at 37 °C under steady agitation in BMM. Minimal inhibitory concentrations (MICs) were determined under proteomics conditions as described previously (9). In short, two ml of antibiotic-supplemented BMM were inoculated with  $5 \times 10^5$  bacteria per ml and incubated at 37 °C under steady agitation for 18 h. The MIC was defined as the lowest antibiotic concentration inhibiting visible growth. In growth experiments, bacterial cultures were treated with different MIC-based antibiotic concentrations after growing to an OD<sub>500</sub> of 0.35. For proteomic experiments those antibiotic concentrations were chosen that led to a reduction in growth rate by ~50% compared to the untreated control.

### Preparation of cytoplasmic (<sup>35</sup>S)-L-methionine-labeled protein fractions

Radioactive labeling was performed as described previously (9). In short, 5 ml of a bacterial culture in early exponential growth phase were exposed to 22.5 µg/ml MP196, 50 µg/ml D-MP196, or 1 µg/ml MP276 respectively, or left untreated as control. After 10 min of antibiotic stress cells were pulse-labeled with (<sup>35</sup>S)-L-methionine for additional 5 min. Radioactive incorporation was stopped by inhibition of protein biosynthesis by chloramphenicol and an excess of cold methionine. Cells were harvested by centrifugation, washed three times in Tris buffer and disrupted by ultrasonication.

### 2D-PAGE

2D gels were prepared as described previously (9). In short, 55 µg of protein for analytical and 300 µg for preparative gels were loaded onto 24 cm immobilized pH gradient (IPG) strips pH 4-7 (GE Healthcare) by passive rehydration for 18 h. Proteins were separated in a first dimension by isoelectric focusing and in a second dimension by SDS-PAGE using 12.5% acrylamide gels. Analytical gel images were analyzed as described by Bandow *et al.* (10) using Decodon Delta 2D 4.1 image analysis software (Decodon, Greifswald, Germany). Proteins found to be induced more than two-fold in three independent biological replicates were defined as marker proteins. Protein spots were manually excised from preparative 2D gels and transferred into 96 well microtiter plates. Tryptic digest with subsequent spotting on a MALDI target was carried out automatically with the Ettan Spot Handling Workstation (Amersham Biosciences, Uppsala, Sweden) as described by Eymann *et al.* (11). MALDI-ToF as well as MALDI-

ToF-ToF measurements were carried out on a 4800 MALDI-ToF/ToF Analyzer (Applied Biosystems, Foster City, CA, USA) as described previously (9). For the five most intense peaks in the MS spectra, MS/MS data was obtained. Peak lists were generated using the “peak to mascot” script of the 4000 Explorer Software V3.5.3 and searched against an in house strain-specific *B. subtilis* 168 sequence database with 4767 entries downloaded from UniProt (May 2nd, 2008) using the Mascot search engine Version 2.1.04 (Matrix Science Ltd, London, UK). Search parameters allowed for one missed cleavage. Carbamidomethylation of cysteine was defined as fixed modification, oxidation of methionine as variable modification. Mass tolerance of precursor ions was set to 50 ppm, and known contaminants were excluded. Protein scores,  $-10 \cdot \log(P)$ , where P is the probability that the observed match is a random event, are derived from ion scores as a non-probabilistic basis for ranking protein hits. Protein scores higher than 49 were considered significant (significance threshold  $p < 0.05$ ).

Protein spots, which could not be identified by MALDI-ToF/ToF (indicated by asterisks in the **SI Appendix, Tab. S2**) were identified using a Synapt G2S high definition mass spectrometer equipped with a lock spray source for electrospray ionization and a ToF detector (Waters, Milford, MA, USA). Manually excised protein spots were destained with 20 mM ammoniumbicarbonate/30% acetonitrile, dried completely, and subsequently tryptically digested (6.25 ng/μl, Promega, Fitchburg, WI, USA). Peptides were eluted into ultrapure water by 15 min of ultrasonication. Eluates were loaded on a trap column ( $C_{18}$ , pore size 100 Å, particle diameter 5 μm, inner diameter 180 μm, length 20 mm) and were then eluted using gradients of acetonitrile with 0.1% formic acid (350 μl/min, linear gradient 2-60% in 40 min) from an analytical column at 50 °C ( $C_{18}$ , pore size 130 Å, particle diameter 1.7 μm, inner diameter 75 μm, length 150 mm) to be subjected to mass spectrometry. Spectra were recorded in positive resolution mode over a mass range of 50 to 1800 m/z with 1 s/scan. The following parameters were used for the NanoLockSpray source: capillary voltage, 3.3 kV; sampling cone voltage, 30 V; source temperature, 80 °C; desolvation temperature, 200 °C; cone gas flow; 50 L/h; desolvation gas flow, 600 L/h. (Glu1)-Fibrinopeptide B serving as lock mass analyte was fed through the lock spray channel (lock mass capillary voltage, 3.2 V). Analysis of the spectra was performed using MassLynx V4.1 SCN813.

Preparation of  $^{15}N/^{14}N$ -labeled membrane proteome fractions

For gel-free proteome analysis of membrane proteins *B. subtilis* 168 was grown aerobically at 37 °C in BMM supplemented with either <sup>15</sup>N-ammonium sulfate/<sup>15</sup>N-L-tryptophan (0.078 mM, 98 atom % excess, Cambridge Isotope Laboratories, Andover, USA) or <sup>14</sup>N-ammonium sulfate and <sup>14</sup>N-L-tryptophan. Cells were harvested by centrifugation either with antibiotic stress imposed at an optical density at 500 nm of 0.4 for 65 min or as a control directly before setting of the stress. Mixing of cell extracts prior to subcellular fractionation steps for relative quantification was carried out according to Otto *et al.* (12). The enriched membrane protein fraction was prepared according to the workflow published in Eymann *et al.* (11) omitting the n-dodecyl-β-D-maltoside treatment step. Preparation of integral membrane peptides (membrane shaving fraction) was carried out as described by Wolff *et al.* (13).

#### ESI-MS measurement

Sample preparation, mass spectrometric measurement for both the enriched membrane protein and membrane shaving fractions, and subsequent data analysis (protein identification and relative quantitation) were carried out as described by Otto *et al.* (12). Logarithmic peak intensities (ratio to the <sup>15</sup>N-labelled standard culture) were normalized to the median of the respective datasets. The cutoff for significant protein upregulation was set to a lognorm change of 0.35, representing the maximal biological variation between different control cultures in >99% of the data points.

#### **Transmission electron microscopy**

Cells were grown in BMM to an OD<sub>500</sub> of 0.35. The main culture was then subdivided into 50 ml aliquots and subcultures were treated with the respective antibiotics for 15 min or left untreated as control. Cells were harvested by centrifugation and washed twice in 100 mM Tris/1 mM EDTA, pH 7.5 and subsequently washed once in the same buffer without EDTA. Preparation of bacterial samples for TEM was performed according to Santhana Raj *et al.* (14) with some modifications. Cells were fixed in 2% glutaraldehyde for 20 min, washed twice with double-distilled water, and subsequently incubated with 2% uranyl acetate for 5 min. Samples were then washed twice with double-distilled water and stained with 2% osmium tetroxide. Cells were centrifuged down and excess of osmium tetroxide solution was discarded. Samples were then dehydrated by an incubation series with 50%, 70%, 90%, and 100% acetone for 5 min

each. Cells were subsequently incubated with 1:1 acetone/epoxy resin for 15 min and then embedded in pure epoxy resin. For preparation of the epoxy resin, solution A (38% Epon 812/62% dodecyl succinic anhydride) was mixed with solution B (47% epon 812/53% methyl nadic anhydride) at a ratio of 3:7. To this mixture tris-2,3,6-(dimethylaminomethyl)phenol (DMP30) was added to a final concentration of 1.5% to accelerate polymerization. Polymerization was performed at 75 °C for 18 h. Blocks were trimmed, cut to 50 nm ultrathin sections and mounted on Formvar-coated (R1201, Plano, Wetzlar, Germany), 75 mesh thin bar copper grids (Stork Veco, Eerbeek, Netherlands). Samples were either stained with 0.2 % lead citrate in 0.1 M NaOH for 3 seconds or, in the case of peptide-tracing with MP276, remained unstained. Samples were examined at 23,000 - 230,000 magnification with a Philips EM410 transmission electron microscope (Philips, Eindhoven, Netherlands) equipped with a Gatan (Pleasanton, CA, USA) digital camera system at an accelerating voltage of 80 kV.

### **Graphite furnace atomic absorption spectrometry**

Cells were grown in BMM until early exponential growth phase. Cultures were divided and 50 ml aliquots were either stressed with the ruthenocene-substituted MP276 or left untreated as controls. After 15 min of antibiotic stress, cells were harvested at 3,320 x g, washed five times with 100 mM Tris/1 mM EDTA, pH 7.5, resuspended in 10 mM Tris, pH 7.5 and disrupted by ultrasonication in a Vial Tweeter instrument (Hielscher, Teltow, Germany). The washing solution was collected at each washing step and subjected to ruthenium measurement. Cell debris was separated from the cytosolic/membrane-containing fraction by centrifugation at 16,100 x g. The resulting pellet containing the cell wall was dissolved in 10 mM Tris, pH 7.5. The membrane fraction was separated from the cytosolic fraction by ultracentrifugation at 150,000 x g for 4 h. The cytosolic fraction was collected and the membrane pellet was dissolved in 10 mM Tris, pH 7.5. All fractions were lyophilized at -20 °C for 24 h in a Freeze Dryer BETA I instrument (Martin Christ, Osterode, Germany). Ruthenium contents were quantified using graphite furnace atomic absorption spectroscopy following a previously described procedure (15-17). Briefly, samples were dissolved in 2 ml of double-distilled water. For ruthenium determination, samples of 160 µl were stabilized by addition of 20 µl of Triton X-100 (final concentration 1%) and 40 µl of 1 N HCl and measured immediately. Standards for

calibration purposes were prepared as aqueous dilutions from a MP276 stock (1 mg/ml in DMSO). A Vario 6 graphite furnace atomic absorption spectrometer (Analytik Jena, Jena, Germany) was used for ruthenium quantitation. Ruthenium was detected at a wavelength of 349.9 nm with a bandpass of 0.5 nm. A deuterium lamp was used for background correction. A volume of 25  $\mu$ l was injected into the graphite tubes. Drying, pyrolysis, and atomization in the graphite furnace were performed according to published procedures (16,17). The mean areas under the curve (AUC) of peaks in the absorption spectra of duplicate injections were used throughout the study. Compartment concentrations were calculated based on cryo-electron microscopy results by Matias and Beveridge (cytosolic volume  $3.09 \times 10^{-9}$   $\mu$ l, membrane volume  $8.99 \times 10^{-11}$   $\mu$ l, cell wall volume  $8.08 \times 10^{-10}$   $\mu$ l) (18,19).

### **Differential scanning calorimetry (DSC)**

1,2-Dipalmitoyl-*sn*-glycero-3-phosphoglycerol (Na-salt) (DPPG), 1,2-Dipalmitoyl-*sn*-glycero-3-phosphoethanolamine (DPPE), and 1,2-Dipalmitoyl-*sn*-glycero-3-phosphocholine were purchased from Avanti Polar Lipids Inc. (Alabaster, AL, USA). Peptides were dissolved in phosphate buffered saline (PBS, 20 mM NaPi, 130 mM NaCl, pH 7.4) at a concentration of 3 mg/ml before each experiment. Aqueous dispersions of lipids of 0.1% (w/w) in PBS buffer were prepared before measurement in the presence (lipid-to-peptide molar ratio of 25:1 and 120:1) and absence of peptides. The respective liposomes were always prepared 10-15  $^{\circ}$ C above the phase transition temperature by vigorous mixing at certain time points. For the preparation of DPPG liposomes we followed a protocol described by Zweytick *et al.* (20). Lipid films of DPPE and DPPG/DPPE 88:12 (w/w) were hydrated at 70  $^{\circ}$ C for 2 h. For the mixture a freeze thaw protocol was used to increase homogenous mixing. DSC experiments were performed with a differential scanning calorimeter (VP-DSC) from MicroCal, Inc. (Northampton, MA, USA). Heating scans were performed at a scan rate of 30  $^{\circ}$ C/h with a final temperature approximately 10  $^{\circ}$ C above the main transition temperature ( $T_m$ ) and cooling scans at the same scan rate with a final temperature about 20  $^{\circ}$ C below  $T_m$ . The heating/cooling cycle was repeated twice, pre-scan thermostating was allowed for 15 min for the heating scans and 1 min for the cooling scans. Enthalpies were calculated by



integrating the peak areas after normalization to phospholipid concentration and baseline adjustment using the MicroCal Origin software (VP-DSC version).

### **Fluorescence microscopy assay for pore formation**

Pore formation was monitored using the Live/Dead BacLight bacterial viability kit (Invitrogen, Carlsbad, CA, USA) following the manufacturer's instructions. *B. subtilis* 168 was grown at 37 °C in BMM under steady agitation until early exponential phase. The main culture was split and aliquots were treated with 22.5 µg/ml MP196, 0.75 µg/ml nisin, 1 µg/ml gramicidin S 10 µg/mL valinomycin, or left untreated as control. After 15 min of antibiotic stress, 2 µl of a 1:1 mixture of the green and red-fluorescing dyes were added per ml of culture and incubated for 15 min in the dark under steady agitation. Cells were washed with 100 mM Tris/1 mM EDTA, pH 7.5 and resuspended in the same buffer. 5 µl of the cell suspension were imaged without fixation or immobilization in fluorescent mode as described before (21). Single channel pictures were combined using the Cell software (Olympus, Hamburg, Germany). Background correction was performed applying the same constant (25) for all images.

### **Potassium release assay**

Potassium efflux experiments were performed as described previously (21) with minor modifications. Briefly, *B. megaterium* ATCC 13632 was grown in half MH to an OD<sub>500</sub> of 1.0 to 1.5, washed with 50 ml cold choline buffer, and resuspended in the same buffer to an OD<sub>500</sub> of 30. For each measurement, cells were diluted in choline buffer (25 °C) to an OD<sub>500</sub> of about 3. Nisin was applied at 3.35 µg/ml (1 µM). MP196 at 125 µg/ml (80 µM), which is equivalent to 50x MIC. No effect was seen with lower MP196 concentrations (2x, 10x MIC). A control culture was left untreated. Potassium efflux was monitored using a pH-meter pH 213 (Hanna Instruments, Kehl am Rhein, Germany) with an MI-442 potassium electrode and an MI-409F reference electrode. Before each experiment, the electrodes were calibrated with standard solutions containing 0.01, 0.1, or 1 mM KCl. Calculations of potassium efflux in percent were performed according to Orlov *et al.* (22). Antibiotic-induced leakage was monitored for 5 min with values taken every 10 seconds and expressed relatively to the total amount of potassium release induced by nisin.

### **Ionomics by inductively coupled plasma atomic emission spectroscopy**

For ionomics only metal-free plastic ware and ultrapure water (Bernd Kraft, Duisburg, Germany) were used. All centrifugation steps were performed for 2 min to reduce sample handling time. *B. subtilis* 168 was grown in BMM until early exponential growth phase. For determination of ion concentrations of cells stressed in medium, subcultures were directly treated with 22.5 µg/ml MP196, 1 µg/ml gramicidin S, and 10 µg/ml valinomycin, respectively, or left untreated as a negative control. After 15 min of antibiotic treatment (proteomic conditions), cells were harvested by centrifugation, washed twice in 100 mM Tris/1 mM EDTA, pH 7.5 and washed once in 100 mM Tris, pH 7.5.

Cell pellets were completely dissolved in 2.5 ml 65% nitric acid (Bernd Kraft, Duisburg, Germany) and incubated at 80 °C for 16 h. Dissolved samples were filled up with ultrapure water (Bernd Kraft, Duisburg, Germany) to 10 ml. Elemental concentrations were determined by inductively coupled plasma atomic emission spectroscopy using an iCAP 6300 Duo View ICP Spectrometer (Thermo Fisher Scientific, Waltham, MA, USA). Liquid calibration standards from 10 µg/l to 10 mg/l of each element of interest (Bernd Kraft, Duisburg, Germany) were run before each series of measurement and selected standards were additionally run every 20 samples as a quality control. Resulting element concentrations were converted into intracellular ion concentrations based on calculation of the cytosolic volume of *B. subtilis*. This volume was taken to be  $3.09 \times 10^{-9}$  µl based on average rod size and *B. subtilis* cell wall and membrane thickness were determined by cryo-electron microscopy by Matias and Beveridge (18,19).

### **Depolarization assay based on GFP-MinD localization**

Localization assays were performed with *B. subtilis* 1981 GFP-MinD (23) as described previously (21). In short, cells were grown over night in BMM and then inoculated in modified BMM containing xylose instead of glucose to induce GFP-MinD expression. Cultures were grown until early exponential growth phase, and subsequently stressed with 22.5 µg/ml MP196, 1 µg/ml gramicidin S or left untreated. After 15 min of antibiotic exposure, cells were imaged in fluorescent mode without fixation or immobilization.

### **DiSC<sub>3</sub>5-based membrane potential measurement**

Determination of membrane potential changes was performed as described by Andrés and Fierro (24) using the membrane potential-sensitive fluorescent dye 3,3'-dipropylthiadicarbocyanine iodide (DiSC<sub>3</sub>5, Sigma-Aldrich, St. Louis, MO, USA). In short, *Bacillus megaterium* ATCC 13632 was grown in half-concentrated MH to an OD<sub>600</sub> of 0.5 and subsequently incubated for 5 min with 3 µM DiSC<sub>3</sub>5. Samples were then treated with 3.3 µg/ml nisin or 25 µg/ml MP196, respectively, or left untreated as control. Fluorescence was measured continuously for 5 min at 651 nm excitation and 675 nm emission wavelengths using a Shimadzu RF-5301PC Spectrofluorometer (Shimadzu, Duisburg, Germany).

### **Determination of cellular ATP levels using luciferase assay**

*B. subtilis* 168 was grown in BMM until reaching an OD<sub>500</sub> of 0.35 and subsequently exposed to 22.5 µg/ml MP196, 0.75 µg/ml nisin, 10 µg/ml valinomycin, 1 µg/ml gramicidin S, and 0.5 µg/ml erythromycin (negative control) for 15 min or left untreated. After stress, cells were harvested by centrifugation, resuspended in 500 µl 10 mM Tris, pH 7.5, and disrupted by ultrasonication. ATP determination was performed using the Perkin Elmer ATPlite 1step assay kit (Waltham, MA, USA) following the manufacturer's instructions. ATP standards were prepared from  $1 \times 10^{-7}$  to  $8.5 \times 10^{-7}$  mol ATP in the provided buffer. For determination of cellular ATP levels 100 µl of cytosolic cell extracts were used. All measurements were performed in quintuple biological and double technical replicates using the Tecan Infinite 200 PRO multimode reader (Tecan, Männedorf, Switzerland).

### **H<sup>+</sup>-ATPase and respiratory chain inhibition assays using inverted vesicles from *M. flavus***

#### Preparation of inverted vesicles

Inverted vesicles were prepared from *M. flavus* according to Burstein *et al.* (25) with some modifications. Briefly, cells were grown in tryptic soy broth until exponential growth phase. One liter of culture was harvested and washed with 100 ml Tris buffer (50 mM Tris-HCl, 2 mM MgCl<sub>2</sub>, 0.5 mM dithiothreitol, 0.5 mM EDTA, pH 8.0). The cell pellet was resuspended in 5 ml Tris buffer, followed by pH readjustment to 8.0 and addition of each

10 µg/ml DNase and RNase. Cells were disrupted mechanically in a Precellys 24 homogenizer using 0.1 mm glass beads (Bertin Technologies, Montigny-le-Bretonneux, France). The crude homogenate was centrifuged at 30,000 x g for 20 min. The resulting supernatant was subsequently centrifuged at 175,000 x g for 120 min. The resulting vesicle-containing pellet was resuspended in 2 ml Tris buffer supplemented with 10% glycerol and stored in liquid nitrogen until usage.

#### Determination of proton uptake

Proton uptake into inverted *M. flavus* vesicles was measured in a microtiter plate assay in a final volume of 200 µl based on the pH-sensitive probe acridine orange as described by Palmgren *et al.* (26). The reaction mixture (20 µM acridine orange, 4 mM MgCl<sub>2</sub>, 10 mM MOPS-BTP (pH 7.0), 140 mM KCl, 1 mM EDTA, 1 mM DTT, 1 mg/ml BSA (essentially fatty acid free), 2.5 µg/ml valinomycin, 75 µg/ml vesicle protein) was preincubated with 20 µM MP196, 20 µM nisin, 20 µM lactoferrin or left untreated as control, respectively, at 25 °C for 30 min. The reaction was initiated by addition of 2mM ATP-BTP and absorbance was measured at 495 nm for 6 h using a Sunrise<sup>TM</sup> multichannel plate reader (Tecan, Männedorf, Switzerland).

#### Determination of respiratory chain activity based on INT reduction

Antibiotic influence on the bacterial electron transport chain was monitored by reduction of iodinitrotetrazolium chloride (INT) using *M. flavus* inverted vesicles as described by Smith and McFeters (27). 20 µg of vesicle protein were preincubated for 30 min in pure phosphate buffer (10 mM potassium phosphate, 5 mM magnesium acetate, pH 6.5) or buffer with 40 µM of MP196, 40 µM nisin, 100 µM antimycin A, or 5 mM rotenone, respectively. Subsequently, 1 mM INT and 0.6 mM NADH or 10 mM succinate were added as substrate and the solution was incubated for 1 h at 25 °C in the dark. INT reduction was stopped by addition of 5% TCA. Insoluble formazan was pelleted for 5 min at 13,000 x g, extracted with 1 ml ethanol and centrifuged again to remove insoluble particles. Absorbance of the supernatant was measured at 485 nm.

#### **SDS-PAGE and Western blot for detection of cytochrome c and MurG**

*B. subtilis* 168 was grown in BMM until early logarithmic growth phase. To investigate the effect of the antimicrobial peptides *in vivo*, cells were subsequently treated with 22.5 µg/ml MP196, 1 µg/ml gramicidin S, or left untreated as control. Cells were harvested by

centrifugation, washed three times in washing buffer (100 mM Tris/1 mM EDTA, pH 7.5), and resuspended in disruption buffer (10 mM Tris, pH 7.5). Cells were disrupted by ultrasonication, cell debris was removed by centrifugation, and cell extracts were subjected to ultracentrifugation at 150,000 x g for 4 h. The resulting membrane pellet was dissolved in washing buffer. Protein concentrations were determined by a Bradford-based assay (Roti-Nanoquant, Carl Roth, Karlsruhe, Germany) according to the manufacturer's instructions. 30 µg of protein were loaded onto a 15% SDS polyacrylamide gel and proteins were separated at 120 V.

To determine effects of peptide treatment on membranes *in vitro*, the membrane fractions of untreated cells were prepared as described above. Prior to SDS-PAGE membrane fractions from 50 ml of a logarithmic *B. subtilis* culture were incubated with 22.5 µg/ml MP196, 1 µg/ml gramicidin S, or left untreated.

After 5 min of antibiotic treatment, aliquots containing 30 µg of membrane protein was loaded on SDS gels. For detection, proteins were then blotted onto a nitrocellulose membrane (Hybond, GE Healthcare, Uppsala, Sweden) at 250 mA and 25 V per blot for 2 h. Membranes were stained with Ponceau S prior to antibody detection to control equal sample loading. Subsequently, membranes were destained in TBST (100 mM Tris, 150 mM NaCl, 0.1% Tween 20, pH 7.5), blocked with 3% non-fat dried milk powder in TBST for 2 h, and subsequently incubated with a rabbit anti-(*E. coli*-)MurG-His antibody (28) in a 1:10,000 dilution in TBST with 1% milk powder for 18 h. Membranes were then washed three times in TBST with 3% milk powder, incubated with a goat anti-rabbit IgG-HRP secondary antibody (Bio-Rad, Berkeley, CA, USA) in a 1:3,000 dilution in TBST with 3% milk powder for 1 h, washed three times with TBST and were then covered with chemiluminescence reagent (Luminata Forte Western HRP Substrate, Merck Millipore, Darmstadt, Germany). Signals were detected with a FluorChem Imaging Workstation (Alpha Innotech, now part of Proteinsimple, Santa Clara, CA, USA). Quantification of band intensity was performed with the ImageQuant TL 1D analysis software (GE Healthcare, Uppsala, Sweden). The same membranes were analogously used for cytochrome c detection using a mouse anti-(pigeon-)cytochrome c antibody (7H8.2C12, abcam, Cambridge, UK) at a final concentration of 2.5 µg/ml and a goat anti-mouse IgG-HRP secondary antibody (Bio-Rad, Berkeley, CA, USA).

### **Light microscopy-based cell wall integrity assay**

Sample preparation and microscopic inspection of the cell shape was performed as described previously (21). Briefly, *B. subtilis* 168 was grown in BMM until early exponential growth phase and subsequently treated with 22.5 µg/ml MP196, 0.75 µg/ml nisin, or left untreated as control. After 15 min of antibiotic stress cells were fixed in a 1:3 mixture of acetic acid and methanol, immobilized in low melting agarose, and subjected to bright field microscopy.

### ***In vitro* lipid II synthesis assay**

*In vitro* lipid II synthesis was performed using *Micrococcus flavus* DSM 1790 membrane preparations as described by Schneider *et al.* (5), adding (<sup>14</sup>C)-UDP-N-acetyl-D-glucosamine (GlcNAc) to label newly synthesized lipid II. Membranes were isolated from lysozyme-treated cells by centrifugation at 40,000 x g, washed twice in washing buffer (50 mM Tris-HCl, 10 mM MgCl<sub>2</sub>, pH 7.5) and frozen in liquid nitrogen. *In vitro* lipid II synthesis was performed in a total volume of 75 µl using 400 µg of membrane protein, 5 nmol C55-P, 50 nmol UDP-N-acetylmuramylpentapeptide (UDP-MurNAc-PP, purified according to Kohlrausch and Höltje (29)), and 50 nmol (<sup>14</sup>C)-UDP-GlcNAc in reaction buffer (60 mM Tris-HCl, 5 mM MgCl<sub>2</sub>, 0.5% (w/v) triton X-100, pH 8.0). Peptides were added in a 2:1 molar ratio to C55-P and incubated with the reaction mixture for 1 h at 37 °C. Subsequently, lipid extraction was performed by addition of 75 µl 2:1 n-butanol/6 M pyridine-acetate, pH 4.2. Lipids were separated by thin layer chromatography using 60F254 silica plates (Merck, Darmstadt, Germany) and chloroform/methanol/water/ammonia (88:48:10:1) as solvent as described by Rick *et al.* (30). Radiolabeled spots were visualized using a Storm 820 Phosphor Imager (Amersham Biosciences, Uppsala, Sweden). Image analysis was performed using the ImageQuant TL v2005 software (Nonlinear Dynamics Ltd, Newcastle Upon Tyne, UK).

### **Lipid II-binding assay**

For *in vitro* lipid II binding of peptides were incubated with 2 nmol lipid II in molar ratios 1:1. Reaction mixtures were incubated at 30 °C for 30 min and applied onto TLC plates (TLC Silica Gel 60 F<sub>254</sub>, Merck, Darmstadt, Germany). Chromatography was performed

in chloroform-methanol-water-ammonia (88:48:10:1) (30) and stained with phosphomolybdic acid stain and 140 °C (PMA).

### **Determination of UDP-MurNAC-pentapeptide accumulation**

Accumulation of UPP-MurNac was analysed by HPLC as described by Schmitt *et al.* (31). *S. simulans* 22 was grown in MH broth to an OD<sub>600</sub> of 0.5. 130 µg/ml chloramphenicol were added in order to prevent induction of autolysis and *de novo* synthesis of enzymes hydrolyzing the nucleotide-activated sugars interfering with determination of the soluble precursor (32). After 15 min, 5 µg/ml MP196 and 0.7 µg/ml vancomycin were added. After 30 min of incubation with the respective peptides cells were harvested and boiled in water. Insoluble components were removed by centrifugation at 13,000 × g for 5 min. Supernatants were adjusted to pH 2 with H<sub>3</sub>PO<sub>4</sub>, filtered through cellulose acetate filters (pore size 0.2 µm) and analyzed by RP-HPLC in 50 mM sodium phosphate buffer, pH 5.2, developed in isocratic mode over 30 min at a flow rate 1 ml/min on a Nucleosil 100-C18 column (Schambeck SFD GmbH, Bad Honnef, Germany).

### **Amino acid analysis (AAA)**

*B. subtilis* 168, JH642, and SMB80 (33) were grown in BMM until an OD<sub>500</sub> of 0.35, harvested by centrifugation (3,220 x g, 10 min, 37 °C), and washed three times in pre-warmed AAA buffer (10.2 mM Na<sub>2</sub>HPO<sub>4</sub>, 1.8 mM KH<sub>2</sub>PO<sub>4</sub>, 25.8 mM KCl, 4.3 mM NaCl). Cells were then resuspended in AAA buffer, readjusted to an OD<sub>500</sub> of 0.35, and stressed with 22.5 µg/ml MP196, 1 µg/ml gramicidin S, 0.75 µg/ml nisin, or 10 µg/ml valinomycin for 15 min or left untreated as control, respectively. Hypoosmotic stress was set by resuspending the cells in double distilled water, hyperosmotic stress by resuspending in AAA buffer containing 6% NaCl, followed by 15 min incubation at 37 °C. Subsequently, cells were harvested by centrifugation (16,100 x g, 10 min, 4 °C). The supernatant was kept for measurement of amino acid leakage whereas the cells were washed three times in AAA buffer (16,100 x g, 10 min, 4 °C), resuspended in the same buffer and disrupted by ultrasonication as described above. In order to analyze only free amino acids, proteins were precipitated with acetone in both intra- and extracellular fractions. Therefore, 100 µl of cell extract and 200 µl of culture supernatant, respectively,

were mixed with the five-fold volume of ice-cold 80% acetone and incubated over night at -20 °C. Precipitated proteins were pelleted (16,100 x g, 20 min, 4 °C) and the resulting, protein-free supernatant was used for HPLC. 500 µl of the protein-free cell extract and 1 ml of protein-free culture supernatant samples, respectively, were dried completely in AAA glass tubes and subsequently dissolved in 10 µl of 20 mM HCl. Amino acid analysis was performed using the Acquity HPLC and AccQ-Tag Ultra system (Waters GmbH, Milford, MA, USA) according to the manufacturer's instructions. In short, 10 µl AccQ-Tag reagent and 30 µl internal norvalin standard (final concentration 10 pmol/µl) was added to the samples for derivatization. Those samples were then incubated for 10 min to allow conversion of primary and secondary amines into stable derivatives. Amino acid derivatives were separated using an AccQ-Tag Ultra RP column and detected by an Acquity UPLC-TUV detector (Waters GmbH, Eschborn, Germany). Amino acids were quantified using 10 pmol/µl amino acid standards. Intracellular amino acid concentrations were calculated based on the *B. subtilis* cellular volume as described above.

### **Minimal inhibitory concentration (MIC) dependence on glutamate and salt concentration**

MIC determination of MP196 under different glutamate and salt concentrations was performed in a microtiter plate assay in modified BMM containing rising concentrations of glutamate (0, 4.5, 45, 450, 3000 mM), NaCl (0, 10, 100, 500, 1000 mM), or KCl (0, 100, 500 mM, cells did not survive 1000 mM KCl). BMM without glutamate was additionally supplemented with 4.5 mM ammonium nitrate as alternative nitrogen source. 200 µl of medium were inoculated with  $5 \times 10^5$  cells/ml of *B. subtilis* 168, *B. subtilis* JH642 (*trpC2 pheA1*), or SMB80 (*trpC2 pheA1 mscL yhdY ykuT yfkC*) (33) and incubated with different antibiotic concentrations for 18 hours at 37 °C. The MIC was defined as the lowest antibiotic concentration inhibiting visible growth.



## ii) Results of the comparative proteome analysis

Proteomic analyses were performed using *B. subtilis* 168, for which a library of proteome response profiles to over 50 antibiotic agents exists (9,21,34,35). Cultures were stressed with sublethal peptide concentrations (**SI Appendix, Fig. S2**) prior to analysis of the cytosolic and membrane proteome. After 10 min of exposure to the peptide, newly synthesized proteins were pulse labeled with L-(<sup>35</sup>S)-methionine for five min and analyzed by 2D gelelectrophoresis. Thirty-six proteins were selectively upregulated in response to MP196 treatment, 32 of which were identified by mass spectrometry (**Fig. 1c, SI Appendix, Tab. S1 and S2**). In parallel, the membrane proteome response was analyzed by LC-ESI-MS/MS. Differential <sup>14</sup>N/<sup>15</sup>N labeling was used for relative quantitation of proteins in the membrane fractions of untreated and peptide-treated cultures. After 65 min of peptide treatment, 178 proteins were upregulated at least two-fold (**SI Appendix, Tab. S3 and S4**). Most differentially regulated proteins are associated with membrane functions, including the general cell envelope stress response, membrane stress response, cell wall biosynthesis, lipid biosynthesis, and energy metabolism.

The tellurium resistance protein, YceC, and toxic anion resistance protein, YceH, previously described as marker proteins for both membrane and cell wall stress (21), were upregulated, along with six other proteins regulated by the cell envelope-responsive alternative sigma factors W ( $\sigma^W$ ) and M ( $\sigma^M$ ). PspA, a homologue of LiaH, which protects cell envelope integrity by binding to the cytoplasmic membrane (36,37), is specifically upregulated following membrane stress, as opposed to peptidoglycan stress (21). Other proteins upregulated in response to MP196 are involved in restructuring of the membrane lipid composition. Among these are proteins involved in fatty acid biosynthesis (FabG and AcpA), alternative fatty acid biosynthesis (YjdA and YoxD), phospholipid biosynthesis (PlsX), lipid-degradation (FadE), and membrane fluidity control (FloT). NAD synthase (NadE) is crucial for energy metabolism and, together with PspA, constitutes a proteomic signature for membrane-mediated stress (21). Other proteins, whose upregulation indicates substantial energy limitation, are involved in glycolysis, the TCA cycle, oxidative phosphorylation, NAD metabolism, and ATP synthesis. Similarly, ATP-requiring proteins including several ABC transporter and

ATP-binding protease subunits were upregulated. And while biosynthesis of housekeeping proteins was largely down-regulated after MP196 treatment, elongation factors Tu and G, which require GTP for activity, were upregulated.

Other notable proteins upregulated included LiaH, the ABC transporter protein YtrE, and the tRNA-modifying enzyme TrmB, which are specific markers for interference with the membrane-bound steps of cell wall biosynthesis (21). Upregulation of MurAA, MurAB, and MurG, enzymes leading up to the synthesis of cell wall precursor lipid II, indicates inhibition of cell wall biosynthesis, as does upregulation of MreB, which is important for localization of the cell wall biosynthesis and cell division machineries, and of the MreB-like protein Mbl. The amino acid racemase RacX and proteins belonging to the *dlt* operon were upregulated. They are involved in cell envelope modification by synthesis of D-amino acids, probably feeding into D-alanylation reactions and lipoteichoic acid biosynthesis, respectively. Also, many proteins involved in amino acid biosynthesis were upregulated, particularly those involved in glutamate and aspartate anabolism.

The proteome analysis prompted the following questions about MP196: Does it interact with the bacterial membrane and, if so, how? How does it influence energy metabolism? How does it affect cell wall biosynthesis? What is the significance of the strong upregulation of amino acid biosynthesis proteins?

The proteome analysis further provided evidence for mechanisms by which *B. subtilis* counteracts peptide-mediated membrane stress (**SI Appendix, Fig. S9c**). One survival strategy is to adapt membrane lipid composition (**SI Appendix, Fig. S9c.I**). Following exposure to MP196, the branched-chain amino acid valine, which is needed as precursor molecule for branched-chain fatty acids, accumulates in the cytosol. Changing the membrane lipid composition by modulating branched-chain fatty acids may interfere with the peptide-membrane interaction. Previous experiments have suggested this: in response to a ferrocene-conjugated MP196 derivative, *Corynebacterium glutamicum* altered the phospholipid headgroups by reducing negatively charged phosphatidylglycerol lipids and increasing uncharged diacylglycerol lipids. This impeded attachment of the peptide to the membrane. In addition, cardiolipin levels were

increased, giving the membrane a more rigid structure, which further obstructed peptide integration (38).

We also observed the induction of FloT, a protein controlling membrane fluidity that is involved in orchestrating physiological processes in lipid microdomains (39).

Upregulation of this protein underscores the importance of membrane properties and indicates that *B. subtilis* alters membrane architecture to counteract impairment of membrane-associated physiological processes.

As western analysis showed, the peripheral membrane protein MurG is released from the membrane upon MP196 treatment. After 65 min MurG levels are found to be strongly upregulated in the membrane fraction, suggesting that at this time MurG again localizes at the membrane and *B. subtilis* (over-)compensates the loss in protein level caused by delocalization.

Additional bacterial adaptation strategies were observed (**SI Appendix, Fig. S9c.II-IV**). First, induction of the *dlt* operon and the RacX protein suggest that there is adjustment of the bacterial cell wall by enhancing wall teichoic acid D-alanylation, to restrict access of the peptide to the membrane. This is a common survival strategy, observed in daptomycin and vancomycin-resistant *Staphylococcus aureus* strains and antimicrobial peptide-resistant Group B *Streptococci* (40-43). Second, the LiaRS cell wall biosynthesis stress response and the  $\sigma^W$ -mediated membrane stress response were strongly upregulated. The LiaH protein forms ring-like multimeric structures and binds to the inner surface of the cytoplasmic membrane upon lipid II-mediated cell wall biosynthesis inhibition (36). It is thought that this stabilizes the membrane. The  $\sigma^W$ -controlled PspA protein is a homologue of LiaH, which fulfils the same stabilizing function when the membrane is damaged (28). Upregulation of both PspA and LiaH reflects the duality of the MP196 mode of action: it impairs membrane function and cell wall biosynthesis.

### iii) Results of cell wall biosynthesis inhibition assays

Glucosamine incorporation was partially inhibited by MP196 (**Fig. 1a**). Glucosamine serves as precursor for N-acetyl-glucosamine (GlcNAc), which feeds into cell wall biosynthesis both at an early cytosolic step leading to UDP-N-acetylmuramic acid (UDP-MurNAc) and at a later membrane-associated step where lipid II is formed. The membrane extrusions are suggestive of inhibition of cell wall biosynthesis at the level of lipid II (5). However, MP196 did not impair lipid II synthesis in an *in vitro* assay using concentrated cell lysate (**SI Appendix, Fig. S7c**). Furthermore, while nisin bound lipid II *in vitro*, preventing it from migrating in the thin layer chromatography matrix, MP196 did not affect lipid II migration (**SI Appendix, Fig. S7b**). HPLC analysis showed that MP196 exposure led to an accumulation of UDP-MurNAc pentapeptide in the intact cell (**SI Appendix, Fig. S7a**), albeit not to the same extent as vancomycin, showing that the cytosolic cell wall biosynthesis steps are largely unaffected. These assays suggest that lipid II is not synthesized efficiently in intact cells.

### iv) References

1. Chantson JT, Varga Falzacappa MV, Crovella S, Metzler-Nolte N (2006) Solid-phase synthesis, characterization, and antibacterial activities of metallocene-peptide bioconjugates. *ChemMedChem* 1(11):1268-1274.
2. Bonelli RR, Schneider T, Sahl HG, Wiedemann I (2006) Insights into *in vivo* activities from gallidermin and epidermin mode-of-action studies. *Antimicrob Agents Chemother* 50(4): 1449-1457.
3. Wadhvani P, Afonin S, Ieronimo M, Buerck J, Ulrich AS (2006) Optimized protocol for synthesis of cyclic gramicidin S: Starting amino acid is key to high yield. *J Org Chem* 71(1): 55-61.
4. Pan YL et al. (2007) Characterization of the structure and membrane interaction of the antimicrobial peptides aurein 2.2 and 2.3 from Australian southern bell frogs. *Biophys J* 92(8): 2854-64.
5. Schneider T et al. (2004) *In vitro* assembly of a complete, pentaglycine interpeptide bridge containing cell wall precursor (lipid II-Gly5) of *Staphylococcus aureus*. *Mol Microbiol* 53(2): 675-685.
6. Urban A et al. (2007) Novel whole-cell antibiotic biosensors for compound discovery. *Appl Environ Microbiol* 73(20): 6436-6443.

7. Stülke J, Hanschke R, Hecker, M (1993) Temporal activation of  $\beta$ -glucanase synthesis in *Bacillus subtilis* is mediated by the GTP pool. *J Gen Microbiol* 139(9): 2041-2045.
8. Agnostopoulos C, Spizizen J (1961) Requirements for transformation in *Bacillus subtilis*. *J Bacteriol* 81(5): 741-746.
9. Wenzel M et al. (2011) Proteomic signature of fatty acid biosynthesis inhibition available for *in vivo* mechanism-of-action studies. *Antimicrob Agents Chemother* 55(6): 2590-2596.
10. Bandow JE et al. (2008) Improved image analysis workflow for 2D gels enables large-scale 2D gel-based proteomics studies - COPD biomarker discovery study. *Proteomics* 8(15): 3030-3041.
11. Eymann C et al. (2004) A comprehensive proteome map of growing *Bacillus subtilis* cells. *Proteomics* 4(10): 2849-2876.
12. Otto A et al. (2010) Systems-wide temporal proteomic profiling in glucose-starved *Bacillus subtilis*. *Nat Commun* 1: 137.
13. Wolff S, Hahne H, Hecker M, Becher, D (2008) Complementary analysis of the vegetative membrane proteome of the human pathogen *Staphylococcus aureus*. *Mol Cell Proteomics* 7(8): 1460-1468.
14. Santhana Raj L et al. (2007) Rapid method for transmission electron microscopy study of *Staphylococcus aureus* ATCC 25923. *Annals of Microscopy* 7, 102-108.
15. Gust R et al. (1998) Stability and cellular studies of (*rac*-1,2-bis(4-fluorophenyl)-ethylenediamine)(cyclo-butane-1,1-dicarboxylato)platinum(II), a novel, highly active carboplatin derivative. *J Cancer Res Clin Oncol* 124(11): 585-597.
16. Schäfer S, Ott I, Gust R, Sheldrick WS (2007) Influence of the polypyridyl (pp) ligand size on the DNA binding properties, cytotoxicity and cellular uptake of organoruthenium(II) complexes of the type  $((\eta^6\text{-C}_6\text{Me}_6)\text{Ru}(\text{L})(\text{pp}))^{n+}$  (L = Cl,  $n = 1$ ; L =  $(\text{NH}_2)_2\text{CS}$ ,  $n = 2$ ). *Eur J Inorg Chem* 19: 3034-3046.
17. Schatzschneider U et al. (2008) Cellular uptake, cytotoxicity, and metabolic profiling of human cancer cells treated with coordinatively saturated octahedral ruthenium(II) complexes  $(\text{Ru}(\text{bpy})_2(\text{N-N})\text{Cl}_2$  with N-N = bpy, phen, dpq, dppz, and dpqn. *ChemMedChem*. 3(7): 1104-1109.
18. Matias VR, Beveridge TJ (2005) Cryo-electron microscopy reveals native polymeric cell wall structure in *Bacillus subtilis* 168 and the existence of a periplasmic space. *Mol. Microbiol.* 56(1): 240-251.
19. Matias VR, Beveridge TJ (2008) Lipoteichoic acid is a major component of the *Bacillus subtilis* periplasm. *J. Bacteriol.* 190(22): 7414-7418.
20. Zweytick D et al. (2006) Influence of N-acylation of a peptide derived from human lactoferricin on membrane selectivity. *Biochim Biophys Acta* 1758(9): 1426-1435.
21. Wenzel M et al. (2012) Proteomic response of *Bacillus subtilis* to lantibiotics reflects differences in interaction with the cytoplasmic membrane. *Antimicrob Agents Chemother* 56(11), 5749-5757.

22. Orlov DS, Nguyen T, Lehrer, RI (2002) Potassium release, a useful tool for studying antimicrobial peptides. *J Microbiol Methods* 49(3): 325-328.
23. Strahl H, Hamoen LW (2010) Membrane potential is important for bacterial cell division. *Proc Natl Acad Sci USA* 107(27): 12281-12286.
24. Andrés MT, Fierro JF (2010) Antimicrobial mechanism of action of transferrins: Selective inhibition of H<sup>+</sup>-ATPase. *Antimicrob Agents Chemother* 54(10): 4335-4342.
25. Burstein C, Tiankova L, Kepes A (1979) Respiratory control in *Escherichia coli* K 12. *Eur J Biochem* 94(2): 387-392.
26. Palmgren MG, Sommarin M, Ulvskov P, Larsson C (1990) Effect of detergents on the H<sup>(+)</sup>-ATPase activity of inside-out and right-side-out plant plasma membrane vesicles. *Biochim Biophys Acta* 1021(2): 133-140.
27. Smith JJ, McFeters GA (1997) Mechanisms of INT (2-(4-iodophenyl)-3-(4-nitrophenyl)-5-phenyl tetrazolium chloride), and CTC (5-cyano-2,3-ditoly tetrazolium chloride) reduction in *Escherichia coli* K-12, *J Microbiol Methods* 29(1): 161-175.
28. Mohammadi T et al. (2007) The essential peptidoglycan glycosyltransferase MurG forms a complex with proteins involved in lateral envelope growth as well as with proteins involved in cell division in *Escherichia coli*. *Mol Microbiol* 65(4): 1106-1121.
29. Kohlrausch U, Höltje JV (1991) One-step purification procedure for UDP-N-acetylmuramyl-peptide murein precursors from *Bacillus cereus*. *FEMS Microbiol Lett* 62(2-3): 253-257.
30. Rick PD et al. (1998) Characterization of the lipid carrier involved in the synthesis of enterobacterial common antigen (ECA) and identification of a novel phosphoglyceride in a mutant of *Salmonella typhimurium* defective in ECA synthesis. *Glycobiology* 8(6): 557-567.
31. Schmitt P et al. (2010) Insight into invertebrate defensin mechanism of action: oyster defensins inhibit peptidoglycan biosynthesis by binding to lipid II. *J Biol Chem* 285(38): 29208-29216.
32. Dai D, Ishiguro EE (1988) MurH, a new genetic locus in *Escherichia coli* involved in cell wall peptidoglycan biosynthesis. *J Bacteriol* 170(5): 2197-2201.
33. Hoffmann T, Boiangiu C, Moses S, Bremer S (2008) Responses of *Bacillus subtilis* to hypotonic challenges: physiological contributions of mechanosensitive channels to cellular survival. *Appl Environ Microbiol* 74(8): 2454-2460.
34. Brötz-Oesterhelt H et al. (2005) Dysregulation of bacterial proteolytic machinery by a new class of antibiotics. *Nat Med* 11(10): 1082-1087.
35. Bandow JE, Brötz H, Leichert LI, Labischinski H, Hecker M (2003) Proteomic approach to understanding antibiotic action. *Antimicrob Agents Chemother* 47(3), 948-955.

36. Wolf D et al. (2010) In-depth profiling of LiaR response in *Bacillus subtilis*. *J Bacteriol* 192(18): 4680-4693.
37. Kobayashi R, Suzuki T, Yoshida M *Escherichia coli* phage-shock protein A (PspA) binds to membrane phospholipids and repairs proton leakage of the damaged membranes. *Mol Microbiol* 66(1): 100-109.
38. Fränzel B et al. (2010) *Corynebacterium glutamicum* exhibits a membrane-related response to a small ferrocene-conjugated antimicrobial peptide. *J Biol Inorg Chem* 15(8): 1293-1303.
39. López D, Kolter R (2012) Functional microdomains in bacterial membranes. *Genes Dev* 24(17): 1893-1902.
40. Weidenmaier C, Peschel A (2008) Teichoic acids and related cell-wall glycopolymers in Gram-positive physiology and host interactions. *Nat Rev Microbiol* 6(4):276-287.
41. Bertsche U, et al. (2011) Correlation of daptomycin resistance in a clinical *Staphylococcus aureus* strain with increased cell wall teichoic acid production and D-alanylation. *Antimicrob Agents Chemother* 55(8):3922-3928.
42. Rose WE, Fallon M, Moran JJ, Vanderloo JP (2012) Vancomycin tolerance in methicillin-resistant *Staphylococcus aureus*: Influence of vancomycin, daptomycin, and telavancin on differential resistance gene expression. *Antimicrob Agents Chemother* 56(8):4422-4427.
43. Saar-Dover R, et al. (2012) D-alanylation of lipoteichoic acids confers resistance to cationic peptides in group B streptococcus by increasing the cell wall density. *PLoS Pathog* 8(9):e1002891.

v) **SI Tables**

**Table S1:** Marker proteins induced in the cytosolic proteome

| protein ID | protein function                                                      | functional category  | regulator                    |
|------------|-----------------------------------------------------------------------|----------------------|------------------------------|
| SpoVG      | negative effector of asymmetric septation at the onset of sporulation | sporulation          | $\sigma^H$                   |
| Spo0M      | sporulation-control gene                                              | sporulation          | $\sigma^W/\sigma^H$          |
| YdaG       | general stress protein                                                | general stress       | $\sigma^B$                   |
| YtxH       | general stress protein                                                | general stress       | $\sigma^B/\sigma^H$          |
| Dps        | DNA-protecting protein, ferritin                                      | general stress       | $\sigma^B$                   |
| ClpP       | ATP-dependent Clp protease proteolytic subunit                        | general stress       | $\sigma^B$                   |
| YdbD       | manganese-containing catalase                                         | oxidative stress     | unknown                      |
| AzoR2      | azoreductase                                                          | oxidative stress     | $\sigma^G$                   |
| YceC       | similar to tellurium resistance protein                               | cell envelope stress | $\sigma^B/\sigma^W/\sigma^M$ |
| YceH       | similar to toxic anion resistance protein                             | cell envelope stress | $\sigma^B/\sigma^W/\sigma^M$ |
| YthP       | similar to ABC transporter                                            | cell envelope stress | $\sigma^W$                   |
| YfhM       | similar to epoxide hydrolase                                          | cell envelope stress | $\sigma^B/\sigma^W$          |
| FosB       | bacillithiol-S-transferase                                            | cell envelope stress | $\sigma^W$                   |
| YtrE       | similar to ABC transporter                                            | cell envelope stress | YtrA                         |
| LiaH       | modulator of LiaHGFSR operon expression                               | cell wall            | LiaRS                        |
| DltA       | D-alanyl-D-alanine carrier protein ligase                             | cell wall            | $\sigma^D/\sigma^X/\sigma^M$ |
| RacX       | amino acid racemase                                                   | cell wall            | $\sigma^W$                   |
| PspA       | phage shock protein A homolog                                         | membrane             | $\sigma^W$                   |
| YjdA       | similar to 3-ketoacyl-acyl-carrier protein reductase                  | membrane             | $\sigma^E$                   |
| YoxD       | similar to 3-oxoacyl-acyl-carrier protein reductase                   | membrane             | unknown                      |
| YuaI       | involved in reducing membrane fluidity                                | membrane             | $\sigma^W$                   |
| NadE       | NAD synthetase                                                        | energy               | $\sigma^B$                   |
| BglH       | phospho-beta-glucosidase                                              | energy               | CcpA                         |
| CitZ       | citrate synthase                                                      | energy               | CcpA                         |
| YwrO       | similar to NAD(P)H oxidoreductase                                     | energy               | unknown                      |
| IoIS       | also/keto reductase                                                   | energy               | IoIR                         |
| YhdN       | aldo/keto reductase specific for NADPH                                | energy               | $\sigma^B$                   |
| NfrA       | FMN-containing NADPH-linked nitro/flavin reductase                    | energy               | Spx                          |
| RocA       | 3-hydroxy-1-pyrroline-5-carboxylate dehydrogenase                     | amino acids          | RocR                         |
| TrmB       | tRNA (m7G46) methyltransferase                                        | tRNA modification    | unknown                      |
| RpsB       | ribosomal protein S2                                                  | translation          | unknown                      |
| YvlB       | unknown                                                               | unknown              | unknown                      |



**Table S2:** MALDI-ToF-MS data of identified cytosolic marker proteins (2D gel-based approach)

| protein ID | protein name                                         | mass weight | pI   | peptide count | protein score | protein score C.I. % |
|------------|------------------------------------------------------|-------------|------|---------------|---------------|----------------------|
| AzoR2      | azoreductase                                         | 23257       | 5.26 | 7             | 117           | 100                  |
| BglH       | phospho-beta-glucosidase                             | 53255       | 5.13 | 13            | 287           | 100                  |
| CitZ       | citrate synthase                                     | 41702       | 5.55 | 16            | 444           | 100                  |
| ClpP       | ATP-dependent Clp protease proteolytic subunit       | 21668       | 5.19 | 12            | 353           | 100                  |
| DitA       | D-alanyl-D-alanine carrier protein ligase            | 55773       | 5.10 | 13            | 276           | 100                  |
| Dps        | DNA-protecting protein, ferritin                     | 16583       | 4.64 | 8             | 168           | 100                  |
| FosB       | bacillithiol-S-transferase                           | 17161       | 6.14 | 4             | 754           | *                    |
| IolS       | aldo/keto reductase                                  | 35146       | 5.50 | 16            | 280           | 100                  |
| LiaH       | modulator of LiaHGFSR operon expression              | 25682       | 6.20 | 13            | 112           | 100                  |
| NadE       | NAD synthetase                                       | 30376       | 5.07 | 16            | 459           | 100                  |
| NfrA       | FMN-containing NADPH-linked nitro/flavin reductase   | 28302       | 5.73 | 20            | 9602          | *                    |
| PspA       | phage shock protein A                                | 25125       | 5.87 | 11            | 91            | 100                  |
| RacX       | amino acid racemase                                  | 25270       | 5.46 | 3             | 73            | 100                  |
| RocX       | 3-hydroxy-1-pyrroline-5-carboxylate dehydrogenase    | 56284       | 5.58 | 52            | 12601         | *                    |
| RpsB       | ribosomal protein S2                                 | 27950       | 6.27 | 16            | 279           | 100                  |
| Spo0M      | sporulation-control gene                             | 29714       | 4.26 | 63            | 25783         | *                    |
| SpoVG      | negative effector of sporulation                     | 10886       | 5.25 | 10            | 348           | 100                  |
| TrmB       | tRNA (guanine-N(7)-)-methyltransferase               | 24488       | 6.32 | 7             | 53            | 98                   |
| YceC       | similar to tellurium resistance protein              | 21810       | 5.46 | 14            | 224           | 100                  |
| YceH       | unknown                                              | 41646       | 5.90 | 13            | 263           | 100                  |
| YdaG       | general stress protein                               | 15867       | 5.33 | 5             | 100           | 100                  |
| YdbD       | manganese-containing catalase                        | 30238       | 5.06 | 10            | 103           | 100                  |
| YfhM       | similar to epoxide hydrolase                         | 32737       | 6.07 | 20            | 7499          | *                    |
| YhdN       | aldo/keto reductase specific for NADPH               | 37289       | 4.96 | 10            | 132           | 100                  |
| YjdA       | similar to 3-ketoacyl-acyl-carrier protein reductase | 27432       | 5.74 | 5             | 55            | 99                   |
| YoxD       | similar to 3-oxoacyl-acyl-carrier protein reductase  | 25283       | 5.48 | 20            | 434           | 100                  |
| YqiG       | similar to NADH-dependent flavin oxidoreductase      | 40780       | 5.34 | 19            | 325           | 100                  |
| YthP       | similar to ABC transporter                           | 26490       | 5.39 | 5             | 195           | 100                  |
| YtrE       | similar to ABC transporter                           | 25444       | 5.99 | 11            | 241           | 100                  |
| YtxH       | general stress protein                               | 16675       | 5.30 | 5             | 131           | 100                  |
| YuaI       | involved in reducing membrane fluidity               | 19830       | 5.31 | 7             | 167           | 100                  |
| YvIB       | unknown                                              | 41056       | 5.50 | 15            | 121           | 100                  |
| YwrO       | similar to NAD(P)H oxidoreductase                    | 19942       | 5.33 | 7             | 166           | 100                  |

\* Identification was carried out using a Synapt G2S HDMS mass spectrometer (see SI Appendix, Experimental Details)

**Table S3:** Marker proteins induced in the membrane proteome

| ID     | protein function                                                                                         | pathway                                               | category        | repressor      | activator           |
|--------|----------------------------------------------------------------------------------------------------------|-------------------------------------------------------|-----------------|----------------|---------------------|
| PtkA   | protein tyrosine kinase involved in biofilm formation                                                    | antibiotic stress                                     | stress response | AbrB           |                     |
| YaaN   | similar to toxic cation resistance protein                                                               | detoxication                                          | stress response |                | $\sigma^W$          |
| YfhM   | similar to epoxide hydrolase                                                                             | detoxication, sigma b dependent, phosphate starvation | stress response |                | $\sigma^W/\sigma^B$ |
| RsbW   | anti-sigma factor                                                                                        | general stress response sigma b                       | stress response |                | $\sigma^B$          |
| PcrA   | ATP-dependent DNA helicase                                                                               | mismatch repair, nucleotide excision repair           | stress response | LexA           |                     |
| ClpX   | ATP-dependent Clp protease ATP-binding subunit                                                           | heat shock                                            | stress response | CtsR           |                     |
| HsiU   | ATP-dependent protease ATP-binding subunit                                                               | heat shock                                            | stress response | CodY           |                     |
| DnaK   | class I heat-shock protein                                                                               | heat shock                                            | stress response | HrcA           |                     |
| LonA   | class III heat-shock ATP-dependent Lon protease                                                          | heat shock                                            | stress response | CtsR           |                     |
| YciC   | putative metallochaperone with NTPase activity/probably part of a low-affinity pathway of zinc transport | chaperone/zinc transport                              | stress response | Zur            |                     |
| EngD   | GTP-dependent nucleic acid-binding protein                                                               | competence                                            | stress response |                | ComK                |
| NucA   | endonuclease                                                                                             | competence                                            | stress response |                | ComK                |
| DegS   | two-component sensor histidine kinase                                                                    | competence                                            | stress response |                |                     |
| KinD   | two-component sensor histidine kinase                                                                    | sporulation                                           | stress response |                |                     |
| SpoIVA | required for proper spore cortex formation and coat assembly                                             | sporulation                                           | stress response |                | $\sigma^E$          |
| YlbC   | unknown                                                                                                  | sporulation                                           | stress response |                |                     |
| McsB   | protein arginine kinase                                                                                  | protein modification                                  | stress response |                |                     |
| SrfAA  | surfactin synthetase                                                                                     | antibiotic production                                 | stress response | Abh, CodY, Spx | ComA, PerR          |
| SrfAB  | surfactin synthetase                                                                                     | antibiotic production                                 | stress response | Abh, CodY, Spx | ComA, PerR          |
| SrfAC  | surfactin synthetase                                                                                     | antibiotic production                                 | stress response | Abh, CodY, Spx | ComA, PerR          |
| YsdB   | unknown                                                                                                  | control of SigW activity, survival of heat stress     | cell envelope   |                | $\sigma^B/\sigma^W$ |
| YacL   | unknown                                                                                                  | survival of salt and ethanol stresses                 | cell envelope   |                | $\sigma^B/\sigma^M$ |
| YpuA   | unknown                                                                                                  | unknown                                               | cell envelope   |                | $\sigma^M$          |
| YobJ   | unknown                                                                                                  | unknown                                               | cell envelope   |                | $\sigma^W$          |
| YteJ   | unknown                                                                                                  | unknown                                               | cell envelope   |                | $\sigma^W$          |
| BioD   | dethiobiotin synthetase                                                                                  | biotin metabolism                                     | membrane        | BirA           |                     |
| BioI   | cytochrome P450 enzyme                                                                                   | biotin metabolism, detoxication                       | membrane        | BirA           |                     |
| AcpA   | acyl carrier protein                                                                                     | fatty acid biosynthesis                               | membrane        | FapR           |                     |
| FabG   | beta-ketoacyl-acyl carrier protein reductase                                                             | fatty acid biosynthesis                               | membrane        | FapR           |                     |

| ID    | protein function                                                                                                          | pathway                                             | category      | repressor                       | activator                               |
|-------|---------------------------------------------------------------------------------------------------------------------------|-----------------------------------------------------|---------------|---------------------------------|-----------------------------------------|
| PlsX  | involved in fatty acid/phospholipid synthesis                                                                             | fatty acid biosynthesis                             | membrane      | FapR                            |                                         |
| YhfT  | similar to long-chain fatty-acid-CoA ligase                                                                               | fatty acid biosynthesis                             | membrane      |                                 |                                         |
| FadE  | acyl-CoA dehydrogenase                                                                                                    | fatty acid biosynthesis                             | membrane      | CcpA, FadE                      | SdpR                                    |
| GlpD  | glycerol-3-phosphate dehydrogenase                                                                                        | glycerophospholipid metabolism                      | membrane      | CcpA                            | AbrB,<br>GlpP                           |
| FloT  | similar to flotillin 1, orchestration of physiological processes in lipid microdomains                                    | control of membrane fluidity                        | membrane      |                                 |                                         |
| DynA  | dynamamin-like protein                                                                                                    | membrane fusion                                     | membrane      |                                 |                                         |
| DltB  | D-alanine esterification of lipoteichoic acid and wall teichoic acid/D-alanyl transfer from Dcp to undecaprenol-phosphate | lipoteichoic acid biosynthesis                      | cell wall     | Spo0A,<br>stringent<br>response | $\sigma^M/\sigma^X/\sigma^D$ ,<br>YvrHb |
| DltD  | D-alanine transfer from undecaprenol-phosphate to the poly(glycerophosphate) chain of LTA                                 | lipoteichoic acid biosynthesis                      | cell wall     | Spo0A,<br>stringent<br>response | $\sigma^M/\sigma^X/\sigma^D$ ,<br>YvrHb |
| Ddl   | D-alanyl-D-alanine ligase A                                                                                               | peptidoglycan biosynthesis                          | cell wall     |                                 | $\sigma^M$                              |
| MreB  | cell shape-determining protein                                                                                            | peptidoglycan biosynthesis                          | cell wall     |                                 | $\sigma^M$                              |
| Mbl   | MreB-like protein                                                                                                         | peptidoglycan biosynthesis                          | cell wall     | stringent<br>response           | $\sigma^E$                              |
| MurAB | UDP-N-acetylglucosamine 1-carboxyvinyltransferase                                                                         | peptidoglycan biosynthesis                          | cell wall     |                                 |                                         |
| MurAA | UDP-N-acetylglucosamine 1-carboxyvinyltransferase                                                                         | peptidoglycan biosynthesis                          | cell wall     |                                 |                                         |
| MurG  | UDP-N-acetylglucosamine-N-acetylmuramyl-(pentapeptide)pyrophosphoryl-undecaprenol N-acetylglucosamine transferase         | peptidoglycan biosynthesis                          | cell wall     |                                 |                                         |
| LytA  | involved in the secretion of major autolysin LytC (amidase)                                                               | lysis and remodeling of peptidoglycan               | cell wall     | SlrR                            | $\sigma^D$ , YvrHb                      |
| Yych  | negative effector of Walk                                                                                                 | control of cell wall metabolism                     | cell wall     |                                 |                                         |
| GdpP  | cyclic di-AMP phosphodiesterase                                                                                           | cell wall homeostasis                               | cell wall     |                                 |                                         |
| YbbP  | maybe involved in the synthesis of c-di-AMP in vegetative cells                                                           | cell wall homeostasis                               | cell wall     |                                 |                                         |
| FtsA  | membrane anchor of FtsZ                                                                                                   | septum formation                                    | cell division |                                 | $\sigma^H$ , WalR                       |
| YydI  | ABC transporter (ATP-binding protein)                                                                                     | antibiotic transport system                         | transporter   | AbrB, Rok                       |                                         |
| YybJ  | similar to ABC transporter (ATP-binding protein)                                                                          | antibiotic transport system, iorganic ion transport | transporter   |                                 |                                         |
| YdbJ  | similar to ABC transporter (ATP-binding protein)                                                                          | antibiotic transport system, multidrug transporter  | transporter   |                                 |                                         |
| YutK  | similar to Na <sup>+</sup> /nucleoside cotransporter                                                                      | concentrative nucleoside transporter                | transporter   |                                 |                                         |
| OpuAA | glycine betaine ABC transporter                                                                                           | osmoprotectant transport system, choline transport  | transporter   |                                 |                                         |
| OpuCC | glycine betaine/carnitine/choline ABC transporter                                                                         | osmoprotectant transport system, choline transport  | transporter   |                                 |                                         |
| OpuBA | choline ABC transporter (ATP-binding protein)                                                                             | osmoprotectant transport system, choline transport  | transporter   |                                 |                                         |
| DppE  | dipeptide ABC transporter                                                                                                 | peptide transport                                   | transporter   | CodY                            |                                         |
| OppD  | oligopeptide ABC transporter (ATP-binding protein)                                                                        | peptide transport                                   | transporter   | ScoC                            | TnrA                                    |

| ID   | protein function                                                  | pathway                                 | category          | repressor          | activator          |
|------|-------------------------------------------------------------------|-----------------------------------------|-------------------|--------------------|--------------------|
| SufC | similar to ABC transporter, iron metabolism (ATP-binding protein) | transport                               | transporter       |                    |                    |
| ThiV | putative HMP/thiamine permease                                    | amino acid/sugar metabolism             | transporter       | Thi-box            | Thi-box            |
| YlaG | GTPase                                                            | signal transduction                     | protein secretion | stringent response |                    |
| SecA | translocase binding subunit                                       | protein secretion                       | protein secretion |                    |                    |
| AtpC | ATP synthase                                                      | oxidative phosphorylation               | energy metabolism | stringent response |                    |
| QoxC | cytochrome aa3 quinol oxidase (subunit III)                       | oxidative phosphorylation               | energy metabolism | stringent response |                    |
| HemL | glutamate-1-semialdehyde 2,1-aminotransferase                     | porphyrin biosynthesis                  | energy metabolism | PerR               |                    |
| SufB | synthesis of Fe-S-clusters                                        | iron metabolism                         | energy metabolism |                    |                    |
| ResE | two-component sensor histidine kinase                             | regulation of electron transport        | energy metabolism | CcpA               | PhoP, ResD         |
| NadA | quinolinate synthetase                                            | nicotineamide and nicotinate metabolism | energy metabolism | NadR               |                    |
| NadB | L-aspartate oxidase                                               | nicotineamide and nicotinate metabolism | energy metabolism | NadR               |                    |
| NadF | probable inorganic polyphosphate/ATP-NAD kinase 2                 | nicotineamide and nicotinate metabolism | energy metabolism |                    |                    |
| PncB | nicotinate phosphoribosyltransferase                              | nicotineamide and nicotinate metabolism | energy metabolism |                    |                    |
| ThiC | biosynthesis of the pyrimidine moiety of thiamin                  | amino acid/sugar metabolism             | energy metabolism | Thi-box            | Thi-box            |
| SucC | succinyl-CoA synthetase (beta subunit)                            | TCA cycle                               | energy metabolism | CcpA               |                    |
| CitB | aconitate hydratase                                               | TCA cycle                               | energy metabolism | CcpC, CodY, FrsA   |                    |
| Icd  | isocitrate dehydrogenase                                          | TCA cycle                               | energy metabolism | CcpA, CcpC         |                    |
| PycA | pyruvate carboxylase                                              | TCA cycle                               | energy metabolism |                    | stringent response |
| AckA | acetate kinase                                                    | pyruvate metabolism                     | energy metabolism |                    | CcpA, CodY         |
| Tkt  | transketolase                                                     | glycolysis                              | energy metabolism | Spo0A              |                    |
| Pgk  | phosphoglycerate kinase                                           | glycolysis                              | energy metabolism | CggR               |                    |
| Pyk  | pyruvate kinase                                                   | glycolysis                              | energy metabolism |                    |                    |
| GapA | glyceraldehyde-3-phosphate dehydrogenase                          | glycolysis                              | energy metabolism | CggR               |                    |
| Tal  | putative transaldolase                                            | pentose phosphate pathway               | energy metabolism |                    |                    |
| PtsI | phosphotransferase system (PTS) enzyme I                          | PTS                                     | energy metabolism | stringent response | GlcT               |
| FrlB | similar to glutamine-fructose-6-phosphate transaminase            | carbohydrate & nitrogen metabolism      | energy metabolism | CodY, FliR         |                    |
| FrlO | similar to multiple sugar-binding protein                         | carbohydrate & nitrogen metabolism      | energy metabolism | CodY, FliR         |                    |
| YoaC | similar to xylulokinase                                           | carbohydrate metabolism                 | energy metabolism | S-box              | S-box              |
| BdhA | acetoin reductase/2,3-butanediol dehydrogenase                    | carbohydrate metabolism                 | energy metabolism |                    | AbrB               |
| YqfL | modulator of CcpN activity                                        | carbohydrate metabolism                 | energy metabolism |                    |                    |
| GndA | NADP-dependent phosphogluconate dehydrogenase                     | carbohydrate metabolism                 | energy metabolism |                    |                    |
| LutB | lactate catabolic enzyme                                          | carbohydrate metabolism                 | energy metabolism | LutR               |                    |

| ID    | protein function                                                                                       | pathway                                          | category             | repressor   | activator  |
|-------|--------------------------------------------------------------------------------------------------------|--------------------------------------------------|----------------------|-------------|------------|
| YitJ  | probable 5,10-methylenetetrahydrofolate reductase (NADP)                                               | unknown                                          | energy metabolism    | S-box       | S-box      |
| PurA  | adenylosuccinate synthetase                                                                            | purine                                           | nucleotide synthesis | PurR, G-box | G-box      |
| PurB  | adenylosuccinate lyase                                                                                 | purine                                           | nucleotide synthesis | PurR, G-box | G-box      |
| PurC  | phosphoribosylaminoimidazole succinocarboxamide synthetase                                             | purine                                           | nucleotide synthesis | PurR, G-box | G-box      |
| PurD  | phosphoribosylglycinamide synthetase                                                                   | purine                                           | nucleotide synthesis | PurR, G-box | G-box      |
| PurF  | glutamine phosphoribosylpyrophosphate amidotransferase                                                 | purine                                           | nucleotide synthesis | PurR, G-box | G-box      |
| PurH  | phosphoribosylaminoimidazole carboxy formyl formyltransferase and inosine-monophosphate cyclohydrolase | purine                                           | nucleotide synthesis | PurR, G-box | G-box      |
| PurK  | phosphoribosylaminoimidazole carboxylase II                                                            | purine                                           | nucleotide synthesis | PurR, G-box | G-box      |
| PurL  | phosphoribosylformylglycinamide synthetase II                                                          | purine                                           | nucleotide synthesis | PurR, G-box | G-box      |
| Xpt   | xanthine phosphoribosyltransferase                                                                     | purine                                           | nucleotide synthesis | PurR, G-box | G-box      |
| MtnN  | methylthioadenosine/S-adenosylhomocysteine nucleosidase                                                | purine                                           | nucleotide synthesis | Spx         | CymR       |
| PyrAB | carbamoyl-phosphate synthetase                                                                         | pyrimidine                                       | nucleotide synthesis |             | PyrR       |
| PyrE  | orotate phosphoribosyltransferase                                                                      | pyrimidine                                       | nucleotide synthesis |             | PyrR       |
| PyrH  | uridylate kinase                                                                                       | pyrimidine                                       | nucleotide synthesis |             | PyrR       |
| PyrR  | transcriptional attenuator and uracil phosphoribosyltransferase activity                               | pyrimidine                                       | nucleotide synthesis |             | PyrR       |
| CarA  | carbamoyl-phosphate transferase-arginine                                                               | Ala, Asp, Glu                                    | amino acids          |             | AhrC       |
| CarB  | carbamoyl-phosphate transferase-arginine                                                               | Ala, Asp, Glu                                    | amino acids          |             | AhrC       |
| GitA  | glutamate synthase (large subunit)                                                                     | Ala, Asp, Glu                                    | amino acids          | GitC        | FsrA, TnrA |
| AsnB  | asparagine synthetase                                                                                  | Ala, Asp, Glu                                    | amino acids          |             |            |
| GudB  | glutamate dehydrogenase                                                                                | Ala, Asp, Glu, Arg, Pro                          | amino acids          |             |            |
| ArgH  | argininosuccinate lyase                                                                                | Ala, Asp, Glu, Arg, Pro                          | amino acids          |             | AhrC       |
| ArgJ  | ornithine acetyltransferase and amino-acid acetyltransferase                                           | Ala, Asp, Glu, Arg, Pro                          | amino acids          |             | AhrC       |
| YhdR  | similar to aspartate aminotransferase                                                                  | Ala, Asp, Glu, Arg, Pro, Cys, Met, Phe, Tyr, Trp | amino acids          |             |            |
| AlaT  | alanine transaminase                                                                                   | Arg, Pro, Lys                                    | amino acids          |             |            |
| MetC  | similar to cystathionine beta-lyase                                                                    | Cys, Met                                         | amino acids          | S-box       | S-box      |
| MetE  | cobalamin-independent methionine synthase                                                              | Cys, Met                                         | amino acids          | S-box       | S-box      |
| MetK  | S-adenosylmethionine synthetase                                                                        | Met, SAM                                         | amino acids          | S-box       | S-box      |
| MtnK  | methylthioribose kinase                                                                                | Cys, Met                                         | amino acids          | S-box       | S-box      |
| YxjG  | putative methionine synthase                                                                           | met                                              | amino acids          | S-box       | S-box      |
| CysJ  | similar to sulfite reductase                                                                           | sulfur metabolism                                | amino acids          | CysL        |            |
| Sat   | sulfate adenylyltransferase                                                                            | sulfur metabolism                                | amino acids          | S-box       | S-box      |
| ThiO  | glycine oxidase                                                                                        | Gly, Ala, Val, Pro                               | amino acids          | Thi-box     | Thi-box    |
| HisA  | phosphoribosylformimino-5-aminoimidazole carboxamide ribotide isomerase                                | His                                              | amino acids          | T-box       | T-box      |

| ID   | protein function                                                                     | pathway                                   | category      | repressor                     | activator |
|------|--------------------------------------------------------------------------------------|-------------------------------------------|---------------|-------------------------------|-----------|
| LysC | aspartokinase II alpha subunit (aa 1-408) and beta subunit (aa 246-408)              | Lys, Cys, Met, Gly, Ser, Thr              | amino acids   |                               |           |
| AroA | 3-deoxy-D-arabino-heptulosonate 7-phosphate synthase and chorismate mutase-isozyme 3 | Phe, Tyr, Trp                             | amino acids   |                               |           |
| AroB | 3-dehydroquinate synthase                                                            | Phe, Tyr, Trp                             | amino acids   |                               |           |
| AroE | 5-enolpyruvylshikimate-3-phosphate synthase                                          | Phe, Tyr, Trp                             | amino acids   |                               |           |
| AroF | chorismate synthase                                                                  | Phe, Tyr, Trp                             | amino acids   |                               |           |
| ProA | gamma-glutamyl phosphate reductase                                                   | Arg, Pro                                  | amino acids   | T-box                         | T-box     |
| LeuA | 2-isopropylmalate synthase                                                           | Val, Leu, Ile                             | amino acids   | T-box,<br>CodY,<br>CcpA, TnrA | T-box     |
| LeuC | 3-isopropylmalate dehydratase (large subunit)                                        | Val, Leu, Ile                             | amino acids   | T-box,<br>CodY,<br>CcpA, TnrA | T-box     |
| LeuD | 3-isopropylmalate dehydratase (small subunit)                                        | Val, Leu, Ile                             | amino acids   | T-box,<br>CodY,<br>CcpA, TnrA | T-box     |
| IlvB | acetolactate synthase catalytic subunit                                              | Val, Leu, Ile                             | amino acids   | T-box,<br>CodY,<br>CcpA, TnrA | T-box     |
| IlvD | dihydroxy-acid dehydratase                                                           | Val, Leu, Ile                             | amino acids   | T-box,<br>CodY,<br>CcpA, TnrA | T-box     |
| YwaA | similar to branched-chain amino acid aminotransferase                                | Val, Leu, Ile                             | amino acids   |                               |           |
| RelA | ppGpp hydrolase/synthase                                                             | stringent response, amino acid starvation | amino acids   |                               |           |
| YdbR | similar to ATP-dependent RNA helicase                                                | transcription regulation                  | transcription |                               |           |
| GlpP | transcription antiterminator                                                         | transcription regulation                  | transcription |                               | GlpP      |
| Rho  | transcriptional terminator Rho                                                       | transcription regulation                  | transcription |                               |           |
| TufA | elongation factor TU                                                                 | elongation                                | translation   | stringent response            |           |
| FusA | elongation factor G                                                                  | elongation                                | translation   | stringent response            |           |
| RplA | ribosomal protein L1                                                                 | ribosomal proteins                        | translation   | stringent response            |           |
| YydA | similar to pseudouridine methyltransferase                                           | rRNA maturation                           | translation   | stringent response            |           |
| YmcB | tRNA methylthiotransferase                                                           | tRNA maturation                           | translation   | stringent response            |           |
| ProS | prolyl-tRNA synthetase                                                               | tRNA synthetase (Pro)                     | translation   | DnaA                          |           |
| ThrS | threonyl-tRNA synthetase                                                             | tRNA synthetase (Thr)                     | translation   | T-box                         | T-box     |
| ThrZ | threonyl-tRNA synthetase                                                             | tRNA synthetase (Thr)                     | translation   | T-box                         | T-box     |
| LysS | lysyl-tRNA synthetase                                                                | tRNA synthetase (Lys)                     | translation   |                               |           |
| HisS | histidyl-tRNA synthetase                                                             | tRNA synthetase (His)                     | translation   | T-box                         | T-box     |
| GatA | glutamyl-tRNA(Gln) amidotransferase                                                  | tRNA transferase (Glu)                    | translation   |                               |           |

| <b>ID</b> | <b>protein function</b>             | <b>pathway</b>         | <b>category</b> | <b>repressor</b> | <b>activator</b> |
|-----------|-------------------------------------|------------------------|-----------------|------------------|------------------|
| GatB      | glutamyl-tRNA(Gln) amidotransferase | tRNA transferase (Glu) | translation     |                  |                  |
| YebA      | probable membrane protein           | unknown                | unknown         |                  |                  |
| YfhO      | putative membrane protein           | unknown                | unknown         |                  |                  |
| YddK      | unknown                             | unknown                | unknown         |                  |                  |
| YgaO      | unknown                             | unknown                | unknown         |                  |                  |
| YydB      | unknown                             | unknown                | unknown         |                  |                  |
| YufK      | unknown                             | unknown                | unknown         |                  |                  |
| YjcH      | unknown                             | unknown                | unknown         |                  |                  |
| YjjA      | unknown                             | unknown                | unknown         |                  |                  |
| YjlC      | unknown                             | unknown                | unknown         |                  |                  |
| YqeG      | unknown                             | unknown                | unknown         |                  |                  |

**Table S4:** ESI-MS data of the marker proteins identified in the membrane proteome

| protein ID   | control (replicate 1) |      |          | control (replicate 2) |      |          | MP196 (replicate 1) |       |          | MP196 (replicate 2) |       |          |
|--------------|-----------------------|------|----------|-----------------------|------|----------|---------------------|-------|----------|---------------------|-------|----------|
|              | ratio                 | SD   | peptides | ratio                 | SD   | peptides | ratio               | SD    | peptides | ratio               | SD    | peptides |
| O05249 yufK  |                       |      |          |                       |      |          | 1.71                | 0     | 2        | 2.21                | 0.15  | 2        |
| O06491 gatA  |                       |      |          | 1.4                   | 0.14 | 4        | 14.35               | 8.69  | 9        | 10.78               | 14.49 | 4        |
| O06745 yitJ  | 0.52                  | 0.03 | 2        | 0.55                  | 0.03 | 7        | 4.4                 | 0.54  | 12       | 9.53                | 1.23  | 9        |
| O07021 yvfW  | 1.71                  | 0.18 | 2        |                       |      |          | 10.03               | 1.31  | 5        | 16.02               | 5.6   | 4        |
| O07587 yhdR  |                       |      |          |                       |      |          | 25.25               | 8.15  | 5        | 52.68               | 71.85 | 2        |
| O07619 yhfT  |                       |      |          |                       |      |          | 23.06               | 2.96  | 2        | 38.66               | 12.71 | 4        |
| O07631 typA  |                       |      |          | 1.3                   | 0.13 | 4        | 6.73                | 0.48  | 8        | 18.58               | 2.12  | 4        |
| O30509 gatB  |                       |      |          | 1.54                  | 0.32 | 3        | 16.72               | 9.55  | 4        | 40.15               | 27.31 | 3        |
| O31581 yfhM  |                       |      |          |                       |      |          | 21.9                | 1.78  | 3        | 30.97               | 2.39  | 2        |
| O31582 yfhO  |                       |      |          | 1.39                  | 0.07 | 3        | 3.67                | 0.34  | 5        | 4.77                | 0.5   | 3        |
| O31630 yjcH  |                       |      |          |                       |      |          | 5.66                | 0.59  | 3        | 5.2                 | 0.97  | 3        |
| O31632 yjcJ  |                       |      |          |                       |      |          | 10.16               | 1.13  | 2        | 24.1                | 26.22 | 2        |
| O31663 mtnK  | 1.33                  | 0.08 | 4        | 1.41                  | 0.07 | 7        | 18.27               | 1.81  | 12       | 53.31               | 6.45  | 6        |
| O31671 kinD  |                       |      |          |                       |      |          | 2.4                 | 0.49  | 4        | 3.07                | 0.45  | 2        |
| O31749 pyrH  | 0.82                  | 0.03 | 2        | 0.93                  | 0.04 | 2        | 8.06                | 1     | 5        | 12.27               | 0.4   | 2        |
| O31755 proS  |                       |      |          |                       |      |          | 9.17                | 9.34  | 3        | 39.81               | 30.51 | 2        |
| O31778 ymcB  |                       |      |          |                       |      |          | 27.39               | 20.03 | 3        | 68.55               | 4.23  | 2        |
| O32028 mtnN  | 1.64                  | 0.12 | 2        |                       |      |          | 16.5                | 12.38 | 3        | 39.83               | 9.41  | 2        |
| O32039 hisS  |                       |      |          | 1.13                  | 0.03 | 4        | 6.51                | 0.28  | 4        | 11.98               | 1.95  | 2        |
| O32076 yuaG  | 1.4                   | 0.16 | 15       | 1.41                  | 0.09 | 13       | 13.26               | 1.29  | 28       | 13.47               | 1.56  | 18       |
| O32090 yueK  |                       |      |          |                       |      |          | 3.13                | 0.32  | 4        | 5.68                | 0.81  | 5        |
| O32115 yutK  |                       |      |          | 0.7                   | 0.05 | 2        | 1.31                | 0.01  | 2        | 1.73                | 0.36  | 6        |
| O32156 yurO  |                       |      |          | 0.79                  | 0.07 | 2        | 2.45                | 0.2   | 8        | 4.33                | 0.06  | 3        |
| O32157 yurP  |                       |      |          | 0.81                  | 0.1  | 3        | 19.31               | 9.97  | 4        | 45.29               | 4.68  | 2        |
| O32162 yurU  |                       |      |          | 1.19                  | 0.08 | 2        | 23.31               | 1.96  | 6        | 62.73               | 3.09  | 3        |
| O32176 yusJ  |                       |      |          |                       |      |          | 18.81               | 12.36 | 2        | 24.44               | 14.4  | 2        |
| O32213 yvgQ  |                       |      |          |                       |      |          | 16.21               | 6.06  | 4        | 24.38               | 2.68  | 3        |
| O32243 opuCC | 1.27                  | 0.07 | 6        |                       |      |          | 2.93                | 0.05  | 3        | 3.54                | 0.07  | 3        |
| O34394 yjjA  |                       |      |          |                       |      |          | 17.96               | 0.17  | 2        | 29.44               | 5.56  | 2        |
| O34424 yteJ  |                       |      |          |                       |      |          | 3.7                 | 0.46  | 2        | 4.06                | 0.55  | 4        |
| O34580 pcrA  | 1.24                  | 0.09 | 2        | 1.28                  | 0.29 | 5        | 7.69                | 1.42  | 3        | 31.05               | 4.62  | 2        |
| O34586 yIbC  |                       |      |          |                       |      |          | 2.18                | 0.31  | 2        | 2.63                | 0.35  | 3        |
| O34633 yIjC  |                       |      |          |                       |      |          | 1.68                | 0.06  | 2        | 2.76                | 0.04  | 2        |
| O34738 ykoE  |                       |      |          |                       |      |          | 1.34                | 0.12  | 4        | 1.8                 | 0.13  | 2        |
| O34764 sat   |                       |      |          |                       |      |          | 2.46                | 2.48  | 2        | 12.92               | 2.1   | 3        |
| O34774 yobJ  | 0.81                  | 0.12 | 4        | 0.86                  | 0.1  | 7        | 5.78                | 0.47  | 7        | 6.44                | 0.79  | 5        |
| O34788 ydlL  |                       |      |          | 1.29                  | 0.05 | 2        | 3.74                | 0.23  | 6        | 11.06               | 0.58  | 4        |
| O34858 argH  |                       |      |          |                       |      |          | 7.99                | 0.94  | 4        | 28.52               | 5.81  | 4        |
| O34861 yoaC  |                       |      |          |                       |      |          | 4.69                | 0.26  | 6        | 6.4                 | 5.3   | 3        |
| O34934 ppnK2 |                       |      |          |                       |      |          | 21.31               | 2.49  | 2        | 24.87               | 0.89  | 2        |
| O35006 hisA  |                       |      |          |                       |      |          | 5.9                 | 0.71  | 4        | 10.07               | 0.74  | 3        |
| O54408 relA  |                       |      |          | 1.02                  | 0.06 | 9        | 4.64                | 0.53  | 8        | 12.12               | 1.05  | 3        |
| P00497 purF  | 1.31                  | 0.14 | 3        |                       |      |          | 10.58               | 2.1   | 4        | 24.59               | 1.07  | 2        |
| P08495 lysC  |                       |      |          | 2.18                  | 1.13 | 2        | 18.32               | 5.18  | 4        | 87.52               | 8.66  | 2        |
| P08838 ptsl  |                       |      |          | 0.97                  | 0.09 | 7        | 2.45                | 0.1   | 4        | 10.28               | 0.93  | 5        |



| protein ID    | control (replicate 1) |      |          | control (replicate 2) |      |          | MP196 (replicate 1) |       |          | MP196 (replicate 2) |       |          |
|---------------|-----------------------|------|----------|-----------------------|------|----------|---------------------|-------|----------|---------------------|-------|----------|
|               | ratio                 | SD   | peptides | ratio                 | SD   | peptides | ratio               | SD    | peptides | ratio               | SD    | peptides |
| P09339 citB   |                       |      |          | 0.79                  | 0.19 | 3        | 3.36                | 0.63  | 3        | 7.72                | 1.22  | 9        |
| P09124 gapA   | 1.28                  | 0.12 | 7        | 1.21                  | 0.09 | 6        | 31.91               | 5.15  | 5        | 71.4                | 40.82 | 6        |
| P12039 purD   | 1.4                   | 0.1  | 4        | 1.7                   | 0.04 | 2        | 19.18               | 5.95  | 4        | 30.92               | 2.22  | 8        |
| P12042 purL   | 1.29                  | 0.05 | 3        | 1.27                  | 0.02 | 8        | 26.81               | 2.12  | 11       | 40.4                | 1.84  | 9        |
| P12045 purK   |                       |      |          |                       |      |          | 7.39                | 1.57  | 6        | 11.22               | 0.81  | 3        |
| P12046 purC   | 1.62                  | 0.13 | 2        | 1.38                  | 0.26 | 3        | 20.33               | 9.8   | 7        | 43.25               | 8.5   | 3        |
| P12047 purB   |                       |      |          | 1.07                  | 0.09 | 3        | 5.86                | 0.11  | 6        | 14.41               | 3.35  | 7        |
| P12048 purH   | 1.82                  | 0.25 | 3        | 1.59                  | 0.16 | 5        | 20.81               | 4.22  | 6        | 73.17               | 48.09 | 5        |
| P12667 nucA   |                       |      |          |                       |      |          | 0.72                | 0.06  | 3        | 1.11                | 0.41  | 2        |
| P13799 degS   | 1.11                  | 0.04 | 2        |                       |      |          | 11.66               | 0.92  | 6        | 18.85               | 1.21  | 3        |
| P17820 dnaK   |                       |      |          | 1.7                   | 0.04 | 7        | 40.41               | 4.5   | 6        | 58.99               | 31.1  | 10       |
| P17904 rsbW   |                       |      |          |                       |      |          | 20.96               | 4.87  | 2        | 40.23               | 1.16  | 2        |
| P18185 carB   | 1.28                  | 0.18 | 2        | 1.19                  | 0.04 | 4        | 9.55                | 0.88  | 5        | 28.6                | 3.26  | 10       |
| P18255 thrS   |                       |      |          | 0.66                  | 0.11 | 6        | 4.11                | 0.26  | 9        | 21.44               | 9.09  | 7        |
| P18256 thrZ   |                       |      |          | 0.91                  | 0.03 | 7        | 10.98               | 1.1   | 7        | 24.32               | 3.32  | 7        |
| P19669 tal    | 1.06                  | 0.29 | 2        |                       |      |          | 2.07                | 0.17  | 4        | 4.28                | 0.28  | 3        |
| P19670 murAB  |                       |      |          |                       |      |          | 18.25               | 2.28  | 2        | 14.27               | 18.88 | 2        |
| P20691 aroE   |                       |      |          |                       |      |          | 28.16               | 2.08  | 4        | 35.76               | 38.25 | 2        |
| P24136 oppD   |                       |      |          |                       |      |          | 3.15                | 0.33  | 2        | 4.01                | 0.06  | 3        |
| P25972 pyrE   | 1.09                  | 0.19 | 2        |                       |      |          | 9.46                | 0.82  | 2        | 11.65               | 1.12  | 2        |
| P25994 pyrAB  |                       |      |          | 0.66                  | 0.03 | 10       | 3.28                | 0.41  | 13       | 7.01                | 0.57  | 17       |
| P26906 dppE   |                       |      |          | 0.78                  | 0.03 | 3        | 4.83                | 0.01  | 2        | 5.38                | 0.75  | 4        |
| P27206 srfAA  | 0.37                  | 0.07 | 12       | 0.38                  | 0.05 | 31       | 1.99                | 0.49  | 37       | 3.86                | 0.98  | 37       |
| P28264 ftsA   |                       |      |          |                       |      |          | 10.64               | 1.52  | 2        | 15.15               | 0.48  | 2        |
| P28366 secA   | 1.07                  | 0.11 | 6        | 1.04                  | 0.04 | 17       | 10.56               | 0.89  | 18       | 16.05               | 0.77  | 15       |
| P29726 purA   | 0.84                  | 0.09 | 6        | 0.92                  | 0.12 | 4        | 6.25                | 1.57  | 13       | 8.39                | 2.31  | 9        |
| P30300 glpP   |                       |      |          |                       |      |          | 3.25                | 0.15  | 2        | 4.66                | 1.19  | 2        |
| P30949 hemL   |                       |      |          |                       |      |          | 7.88                | 0.33  | 5        | 8.33                | 5.49  | 4        |
| P31102 aroB   | 1.7                   | 0.12 | 4        | 1.81                  | 0.23 | 7        | 20.1                | 8.99  | 8        | 92.54               | 21.03 | 2        |
| P31104 aroF   |                       |      |          | 2.12                  | 0.11 | 2        | 16.64               | 0.7   | 3        | 45.26               | 42.15 | 2        |
| P31847 ypuA   |                       |      |          | 0.86                  | 0.1  | 4        | 8.65                | 1.54  | 3        | 10.55               | 1.32  | 2        |
| P33166 tuf    | 1.33                  | 0.06 | 11       | 1.35                  | 0.07 | 12       | 14.29               | 2.68  | 14       | 32.7                | 20.2  | 11       |
| P34958 qoxC   |                       |      |          | 0.72                  | 0.2  | 5        | 1.95                | 0.13  | 4        | 2.14                | 0.05  | 2        |
| P35149 spolVA |                       |      |          |                       |      |          | 1.77                | 0.11  | 2        | 0.87                | 0.13  | 3        |
| P35164 resE   |                       |      |          | 0.86                  | 0.06 | 4        | 2.86                | 0.66  | 7        | 4.04                | 1.09  | 5        |
| P36838 carA   | 1.12                  | 0    | 2        |                       |      |          | 4.93                | 0.34  | 5        | 13.23               | 3.95  | 6        |
| P36843 argJ   |                       |      |          |                       |      |          | 61.37               | 6.39  | 2        | 118.98              | 14.3  | 2        |
| P37484 yybT   |                       |      |          | 0.96                  | 0.08 | 2        | 2.53                | 0.26  | 5        | 3.3                 | 0.29  | 6        |
| P37494 yybJ   | 0.67                  | 0.02 | 4        |                       |      |          | 3.32                | 0.18  | 4        | 3.42                | 1.04  | 2        |
| P37518 engD   |                       |      |          | 3.22                  | 0.29 | 4        | 13.05               | 5.67  | 6        | 21.23               | 13.14 | 4        |
| P37535 yaaN   |                       |      |          | 1.29                  | 0.04 | 2        | 19.02               | 3     | 6        | 30.73               | 9.04  | 4        |
| P37570 yacI   |                       |      |          |                       |      |          | 7.15                | 0.55  | 2        | 12.29               | 2.4   | 2        |
| P37585 murG   |                       |      |          | 0.8                   | 0.05 | 4        | 4.98                | 1.05  | 2        | 8.78                | 1.66  | 2        |
| P37812 atpC   |                       |      |          |                       |      |          | 2.78                | 0.07  | 2        | 2.85                | 0.26  | 3        |
| P37877 ackA   |                       |      |          |                       |      |          | 65.81               | 37.52 | 4        | 102.55              | 95.95 | 3        |
| P37945 lonA   | 0.92                  | 0.16 | 2        | 0.97                  | 0.07 | 7        | 5.21                | 0.35  | 8        | 12.03               | 1.84  | 6        |
| P38032 nadB   |                       |      |          |                       |      |          | 6.57                | 2.71  | 6        | 14.48               | 1.14  | 6        |

| protein ID   | control (replicate 1) |      |          | control (replicate 2) |      |          | MP196 (replicate 1) |      |          | MP196 (replicate 2) |       |          |
|--------------|-----------------------|------|----------|-----------------------|------|----------|---------------------|------|----------|---------------------|-------|----------|
|              | ratio                 | SD   | peptides | ratio                 | SD   | peptides | ratio               | SD   | peptides | ratio               | SD    | peptides |
| P39580 dltB  |                       |      |          | 0.7                   | 0.01 | 2        | 4.48                | 0.19 | 3        | 5.36                | 0.04  | 2        |
| P39126 icd   | 1.06                  | 0.27 | 6        | 1.14                  | 0.16 | 7        | 5.38                | 0.34 | 10       | 10.55               | 1.91  | 12       |
| P39578 dltD  |                       |      |          | 1.03                  | 0.08 | 4        | 4.79                | 0.24 | 7        | 5.42                | 0.85  | 5        |
| P39765 pyrR  | 1.38                  | 0.11 | 3        | 1.24                  | 0.3  | 2        | 9.22                | 4.19 | 5        | 16.67               | 1.31  | 2        |
| P39778 hsIU  |                       |      |          | 0.92                  | 0.21 | 2        | 4                   | 0.94 | 2        | 6.23                | 0.06  | 2        |
| P39812 gltA  |                       |      |          | 1.07                  | 0.06 | 8        | 6.42                | 0.67 | 15       | 15.77               | 1.12  | 8        |
| P39821 proA  |                       |      |          |                       |      |          | 18.31               | 2.45 | 6        | 39.4                | 1.47  | 2        |
| P39912 aroA  | 1.08                  | 0.23 | 5        | 1.15                  | 0.19 | 6        | 8.08                | 1.52 | 10       | 17.58               | 1.26  | 6        |
| P40924 pgk   | 1.97                  | 0.33 | 3        |                       |      |          | 15.65               | 1.1  | 6        | 32.31               | 6.73  | 7        |
| P42085 xpt   | 1.56                  | 0.01 | 2        | 1.57                  | 0    | 2        | 20.72               | 5.09 | 3        | 52.97               | 2.28  | 2        |
| P42318 yxjG  |                       |      |          |                       |      |          | 6.22                | 2.51 | 5        | 15.56               | 10.04 | 3        |
| P45694 tkt   |                       |      |          | 0.96                  | 0.06 | 2        | 3.84                | 0.89 | 5        | 9.49                | 5.62  | 4        |
| P45740 thiC  |                       |      |          |                       |      |          | 10.48               | 1.83 | 5        | 17.86               | 4.36  | 4        |
| P46920 opuAA | 1.07                  | 0.07 | 4        | 0.93                  | 0.04 | 2        | 5.5                 | 0.39 | 10       | 8.87                | 1.38  | 4        |
| P50735 gudB  | 0.52                  | 0.09 | 3        | 0.62                  | 0.03 | 2        | 5.24                | 0.15 | 6        | 8                   | 0.58  | 7        |
| P50866 clpX  | 0.97                  | 0.02 | 2        | 1.04                  | 0.09 | 5        | 7.62                | 3.94 | 4        | 20.36               | 0.75  | 2        |
| P51785 ilvD  |                       |      |          | 0.62                  | 0.51 | 3        | 5.46                | 0.56 | 5        | 19.38               | 2.31  | 3        |
| P51831 fabG  |                       |      |          |                       |      |          | 6.56                | 1.8  | 5        | 11.35               | 6.31  | 3        |
| P53554 biol  |                       |      |          |                       |      |          | 12.5                | 1.01 | 6        | 27.23               | 0.72  | 3        |
| P53558 bioD  |                       |      |          |                       |      |          | 5.79                | 1.53 | 5        | 4.15                | 2.67  | 2        |
| P54159 y pbR |                       |      |          | 0.87                  | 0    | 2        | 3.38                | 0.14 | 2        | 6.88                | 1.53  | 2        |
| P54419 metK  | 1.25                  | 0.02 | 2        | 1.24                  | 0.06 | 2        | 19.29               | 2.16 | 5        | 23.24               | 10.18 | 6        |
| P54420 asnB  | 0.87                  | 0.06 | 3        | 0.84                  | 0.05 | 13       | 5.32                | 0.31 | 15       | 9.95                | 0.59  | 9        |
| P54452 yqeG  |                       |      |          |                       |      |          | 1.77                | 0.06 | 2        | 2.45                | 0.71  | 2        |
| P54470 yqfL  |                       |      |          |                       |      |          | 7.9                 | 0.05 | 2        | 13.59               | 0.24  | 2        |
| P71018 plsX  |                       |      |          | 0.67                  | 0.04 | 6        | 3.95                | 0.77 | 6        | 7.23                | 0.18  | 2        |
| P71068 yukA  |                       |      |          | 0.48                  | 0.05 | 5        | 2.11                | 0.6  | 6        | 2.92                | 1.16  | 7        |
| P80643 acpA  |                       |      |          |                       |      |          | 7.6                 | 1.07 | 3        | 10.09               | 2.91  | 2        |
| P80858 leuC  |                       |      |          |                       |      |          | 33.35               | 6.13 | 5        | 55.04               | 10.45 | 3        |
| P80859 yqjI  |                       |      |          |                       |      |          | 7.59                | 1.39 | 3        | 6.35                | 7.61  | 2        |
| P80866 yurY  |                       |      |          | 1.39                  | 0.25 | 4        | 7.25                | 2.37 | 3        | 10.56               | 3.24  | 3        |
| P80868 fusA  | 1.45                  | 0.6  | 4        | 1.17                  | 0.07 | 10       | 12.36               | 2.15 | 11       | 32.33               | 2.28  | 6        |
| P80877 metE  | 1                     | 0.21 | 10       | 1.18                  | 0.05 | 20       | 26.19               | 3.04 | 31       | 102.19              | 10.78 | 18       |
| P80885 pyk   |                       |      |          | 1.91                  | 0.11 | 3        | 11.4                | 10.5 | 2        | 32.48               | 8.78  | 4        |
| P80886 sucC  | 1.15                  | 0.15 | 3        | 1.14                  | 0.11 | 9        | 14.72               | 1.08 | 11       | 36.83               | 14.83 | 7        |
| P94400 y ciC |                       |      |          | 1.41                  | 0.05 | 2        | 7.04                | 0.48 | 7        | 27.2                | 3.92  | 4        |
| P94476 yebA  |                       |      |          |                       |      |          | 1.48                | 0.16 | 2        | 2.03                | 0.04  | 2        |
| P94520 ysdB  |                       |      |          |                       |      |          | 2.69                | 0.1  | 2        | 3.12                | 0.4   | 4        |
| P96614 ydbR  | 0.83                  | 0.15 | 3        | 0.77                  | 0.05 | 9        | 4.3                 | 2.53 | 9        | 5.91                | 2.13  | 7        |
| P96648 yddK  |                       |      |          |                       |      |          | 0.27                | 0.03 | 2        | 0.77                | 0.06  | 3        |
| P96716 y wqD |                       |      |          |                       |      |          | 5.99                | 5.7  | 2        | 5.68                | 6.7   | 2        |
| P97029 ygaO  |                       |      |          |                       |      |          | 1.8                 | 0.15 | 2        | 2.04                | 0.2   | 3        |
| Q01465  mreB | 0.96                  | 0.09 | 3        | 1.04                  | 0.07 | 6        | 16.42               | 2.82 | 5        | 22.72               | 1.66  | 6        |
| Q02112 lytA  |                       |      |          |                       |      |          | 0.44                | 0.02 | 3        | 0.67                | 0.14  | 3        |
| Q03222 rho   |                       |      |          |                       |      |          | 3.32                | 0.01 | 2        | 3.41                | 0.05  | 3        |
| Q04747 srfAB | 0.35                  | 0.08 | 14       | 0.44                  | 0.06 | 42       | 2.19                | 0.26 | 44       | 3.98                | 0.45  | 35       |
| Q06754 y acL |                       |      |          | 1.03                  | 0.03 | 2        | 4.48                | 0.12 | 2        | 4.8                 | 0.78  | 2        |

| protein ID  | control (replicate 1) |      |          | control (replicate 2) |      |          | MP196 (replicate 1) |      |          | MP196 (replicate 2) |       |          |
|-------------|-----------------------|------|----------|-----------------------|------|----------|---------------------|------|----------|---------------------|-------|----------|
|             | ratio                 | SD   | peptides | ratio                 | SD   | peptides | ratio               | SD   | peptides | ratio               | SD    | peptides |
| Q45593 yydI |                       |      |          |                       |      |          | 3.39                | 0.78 | 3        | 4.31                | 1.16  | 2        |
| Q06797 rplA |                       |      |          | 0.98                  | 0.36 | 2        | 2.41                | 0.52 | 2        | 4.12                | 0.2   | 2        |
| Q45589 ybbP |                       |      |          | 0.71                  | 0.15 | 2        | 2.26                | 0.37 | 5        | 2.78                | 0.62  | 4        |
| Q45600 yydB |                       |      |          |                       |      |          | 19.62               | 5.97 | 6        | 38.72               | 50.53 | 2        |
| Q45601 yydA |                       |      |          |                       |      |          | 1.26                | 0.05 | 2        | 2.65                | 0.69  | 2        |
| Q794W0 yycH |                       |      |          | 0.94                  | 0.1  | 3        | 2.29                | 0.26 | 7        | 3.12                | 0.27  | 7        |
| Q795M6 alaT |                       |      |          |                       |      |          | 4.35                | 1.08 | 4        | 9.29                | 0.37  | 2        |
| Q9KWU4 pyc  | 1.17                  | 0.01 | 2        | 1.08                  | 0.05 | 9        | 10.42               | 1.04 | 17       | 23.43               | 1.85  | 16       |
| Q9KWZ1 nadA |                       |      |          |                       |      |          | 44.25               | 8.8  | 4        | 49.76               | 43.2  | 3        |

**Table S5:** Marker proteins of MP196 overlapping with markers of other cell envelope-targeting antibiotics - a comparison with the *B. subtilis* proteome response library (14,31). Non-overlapping proteins are not listed but included in the “total marker” count.

|                                    | MP196 | vancomycin | bacitracin | mersacidin | nisin | gallidermin | gramicidin S | daptomycin | gramicidin A | valinomycin |
|------------------------------------|-------|------------|------------|------------|-------|-------------|--------------|------------|--------------|-------------|
| <b>general stress</b>              | YtxH  |            |            |            |       |             |              |            |              | x           |
|                                    | GsiB  |            |            |            |       |             | x            |            |              | x           |
| <b>sporulation</b>                 | Spo0M |            |            | x          | x     | x           | x            |            |              |             |
|                                    | SpoVG |            |            |            |       |             |              |            |              | x           |
| <b>cell envelope stress</b>        | YceC  | x          | x          | x          |       | x           | x            |            |              | x           |
|                                    | YceH  |            |            |            |       | x           | x            |            | x            | x           |
|                                    | LiaH  |            | x          | x          | x     | x           | x            | x          |              |             |
|                                    | YtrE  | x          | x          | x          | x     | x           |              |            |              |             |
|                                    | DltA  |            | x          |            |       | x           |              |            |              |             |
|                                    | RacX  |            |            |            |       |             |              |            |              | x           |
|                                    | PspA  |            |            |            | x     | x           | x            | x          | x            | x           |
|                                    | YthP  |            |            |            |       |             |              |            |              |             |
|                                    | YuaI  |            |            |            |       |             |              |            |              | x           |
|                                    | YjdA  |            |            |            |       |             | x            |            |              | x           |
|                                    | YoxD  | x          |            |            |       |             | x            |            | x            | x           |
|                                    | YfhM  |            |            |            |       |             | x            |            |              |             |
|                                    | FosB  |            |            |            |       |             | x            |            |              |             |
| <b>energy</b>                      | NadE  |            |            |            | x     | x           |              |            | x            | x           |
|                                    | BglH  |            |            |            |       |             |              |            |              | x           |
|                                    | CitZ  |            |            |            |       |             |              |            |              | x           |
|                                    | NfrA  |            |            |            |       | x           | x            |            |              | x           |
|                                    | YwrO  |            |            |            |       |             | x            |            |              |             |
|                                    | YhdN  |            |            |            |       |             |              |            |              | x           |
| <b>oxidative stress</b>            | YdbD  |            |            |            |       |             | x            |            |              | x           |
| <b>tRNA modification</b>           | TrmB  |            |            | x          | x     | x           |              |            |              |             |
| <b>translation</b>                 | RpsB  |            |            |            |       | x           |              |            |              |             |
| <b>unknown</b>                     | YviB  |            |            | x          |       | x           | x            |            |              |             |
| <b>overlapping / total markers</b> | 35/35 | 3/5        | 4/8        | 6/12       | 6/8   | 12/21       | 14/17        | 2/8        | 4/5          | 16/20       |

**Table S6:** Ruthenium concentrations in subcellular fractions of cells treated with the ruthenocene-containing peptide derivative MP276.

|           | ruthenium per cell (pmol) |                       | ruthenium per compartment volume* (pmol/ $\mu$ L) |        |
|-----------|---------------------------|-----------------------|---------------------------------------------------|--------|
|           | control                   | MP276                 | control                                           | MP276  |
| cells     | $1.57 \times 10^{-9}$     | $1.45 \times 10^{-7}$ | -                                                 | -      |
| cytosol   | $2.59 \times 10^{-9}$     | $1.85 \times 10^{-7}$ | 0.65                                              | 46.29  |
| membrane  | $1.85 \times 10^{-9}$     | $6.37 \times 10^{-8}$ | 20.61                                             | 709.41 |
| cell wall | 0                         | $3.38 \times 10^{-8}$ | 0                                                 | 41.93  |

vi) **SI Figures**

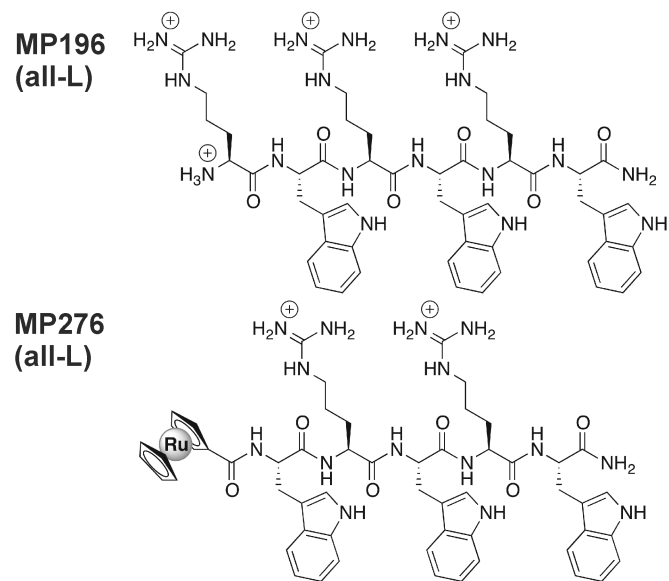

**Figure S1:** Chemical structures of MP196 and MP276.

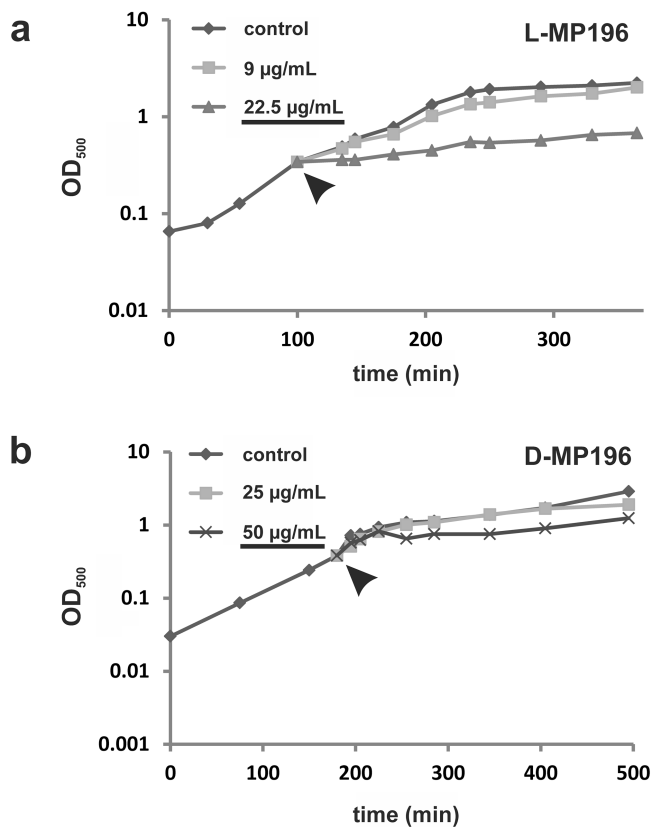

**Figure S2:** Growth of *B. subtilis* in chemically defined medium after treatment with MP196 (a) and D-MP196 (b). Arrowheads indicate the time point of antibiotic addition during logarithmic growth. Peptide concentrations leading to ~50% growth inhibition in relation to the untreated controls were chosen for radioactive labeling and follow up experiments (chosen concentrations are underlined).

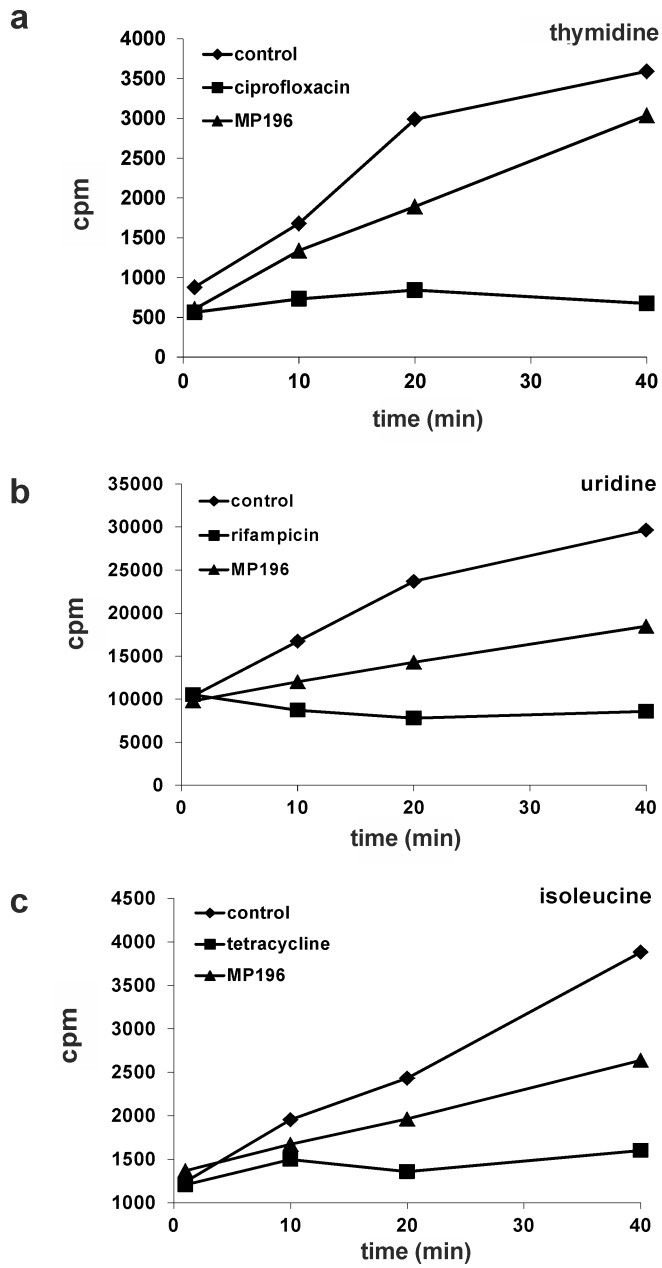

**Figure S3:** Incorporation of radioactively labeled precursor molecules by *Staphylococcus simulans* upon treatment with MP196 or pathway-specific inhibitors: **(a)** DNA precursor thymidine, **(b)** RNA precursor uridine, **(c)** protein precursor isoleucine.



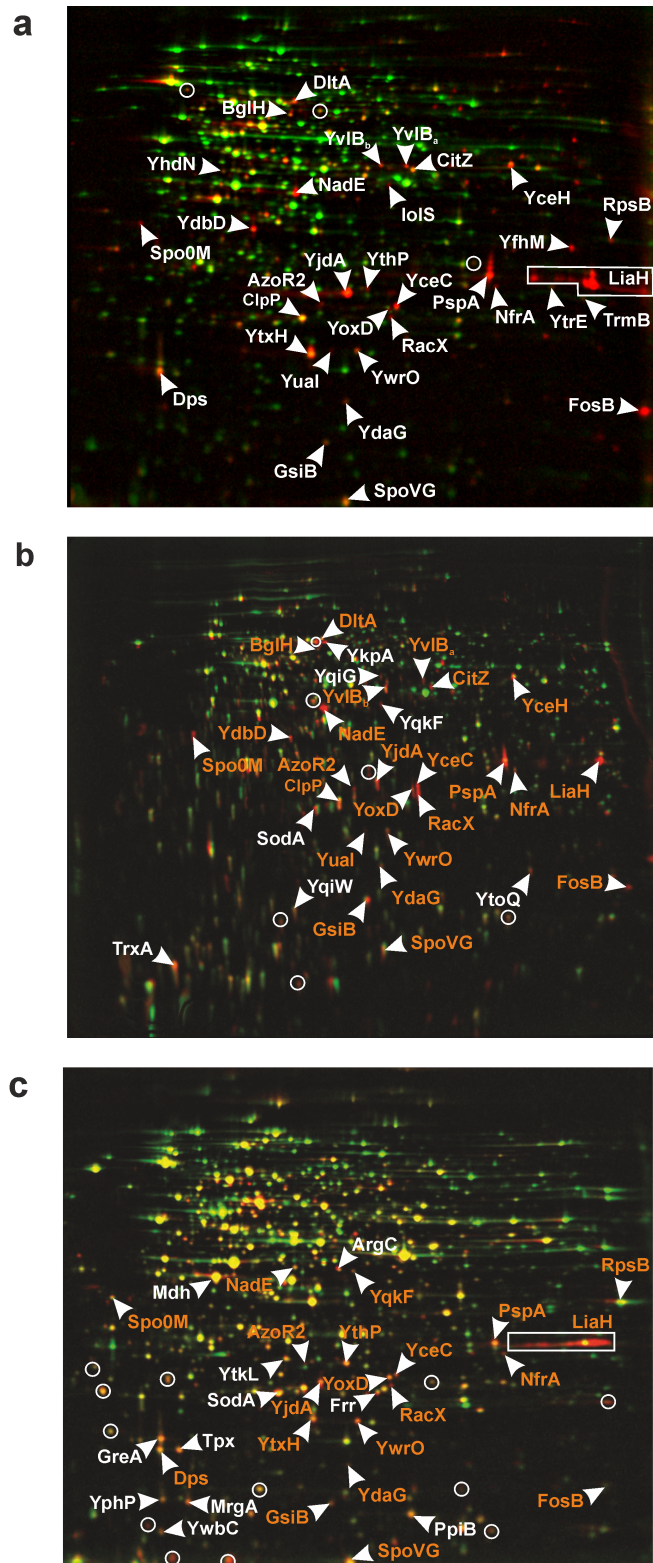

**Figure S4:** 2D gel-based proteome response of *B. subtilis* after treatment with MP196 (a) and D-MP196 (b). Marker proteins upregulated in response to both peptides (c). Overlapping proteins are labeled in orange. Unidentified proteins are circled.

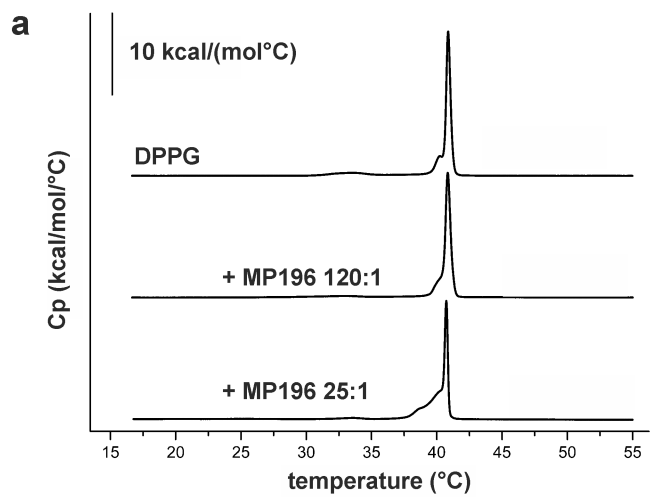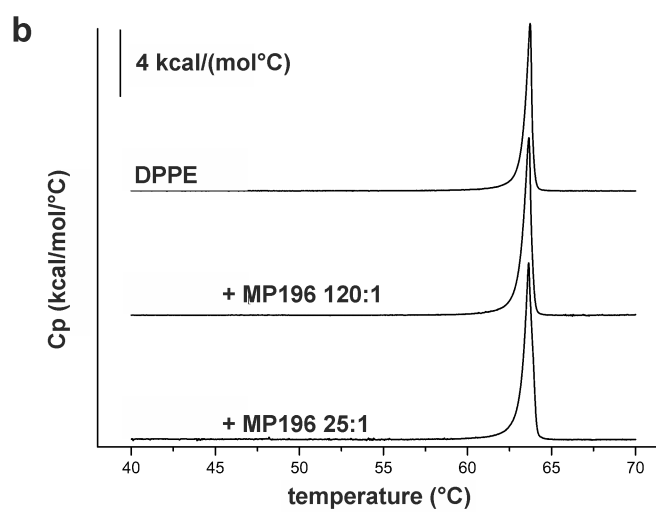

**Figure S5:** DSC thermograms of pure DPPG (**a**) and DPPE (**b**) incubated with MP196.

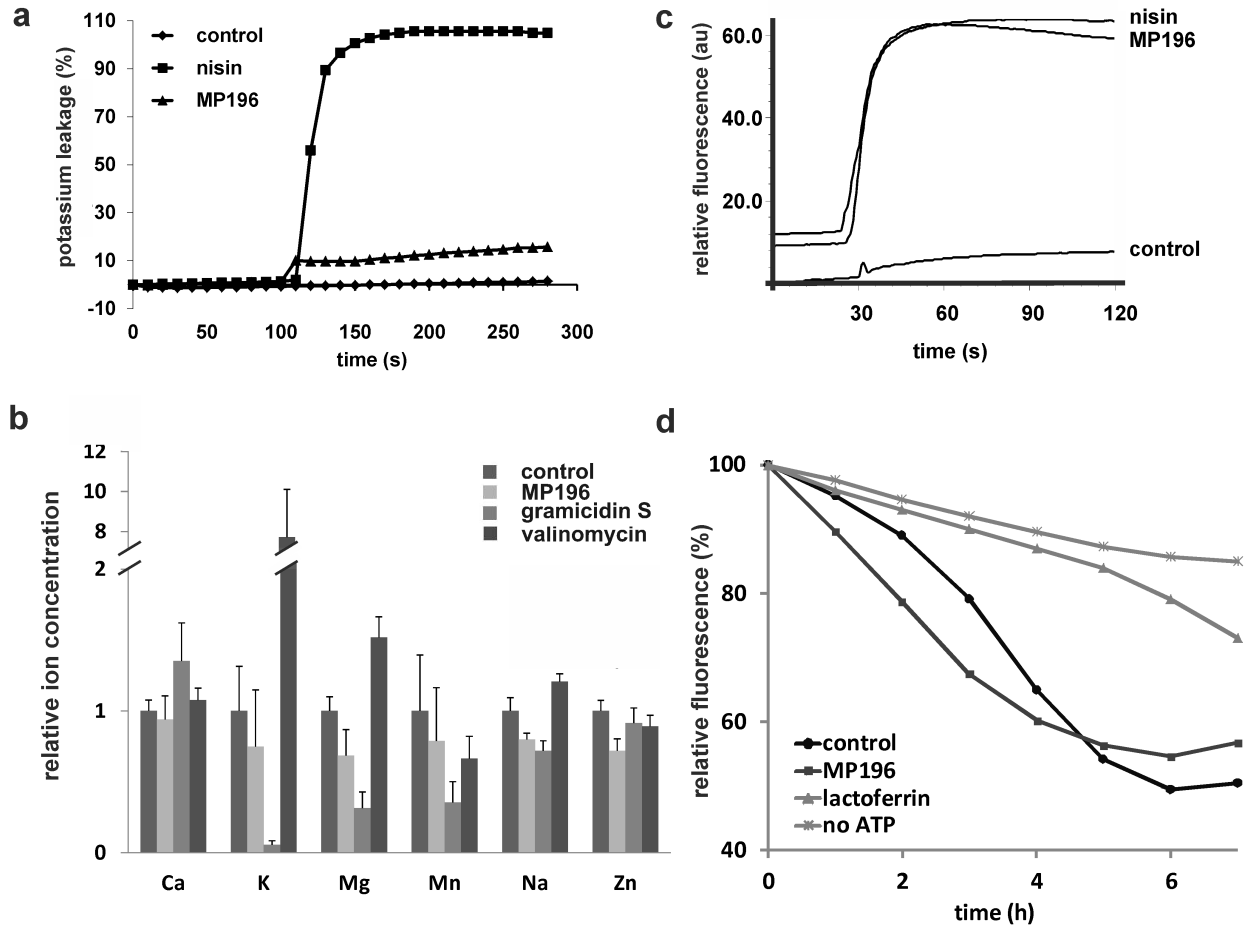

**Figure S6:** (a) Potassium release from whole *B. megaterium* cells. Values are given relative to positive control nisin, which forms pores. (b) Total ion profiles of *B. subtilis* stressed with valinomycin, gramicidin S, and MP196 in defined medium under physiological conditions. (c) DiSC<sub>35</sub>-based depolarization measurements of *B. megaterium* treated with MP196 and nisin, a pore-forming lantibiotic serving as positive control. (d) H<sup>+</sup>-ATPase activity of *M. flavus* inverted vesicles treated with lactoferrin and MP196. Proton pumping activity was measured by the pH-dependent absorbance change of acridine orange at 495 nm.

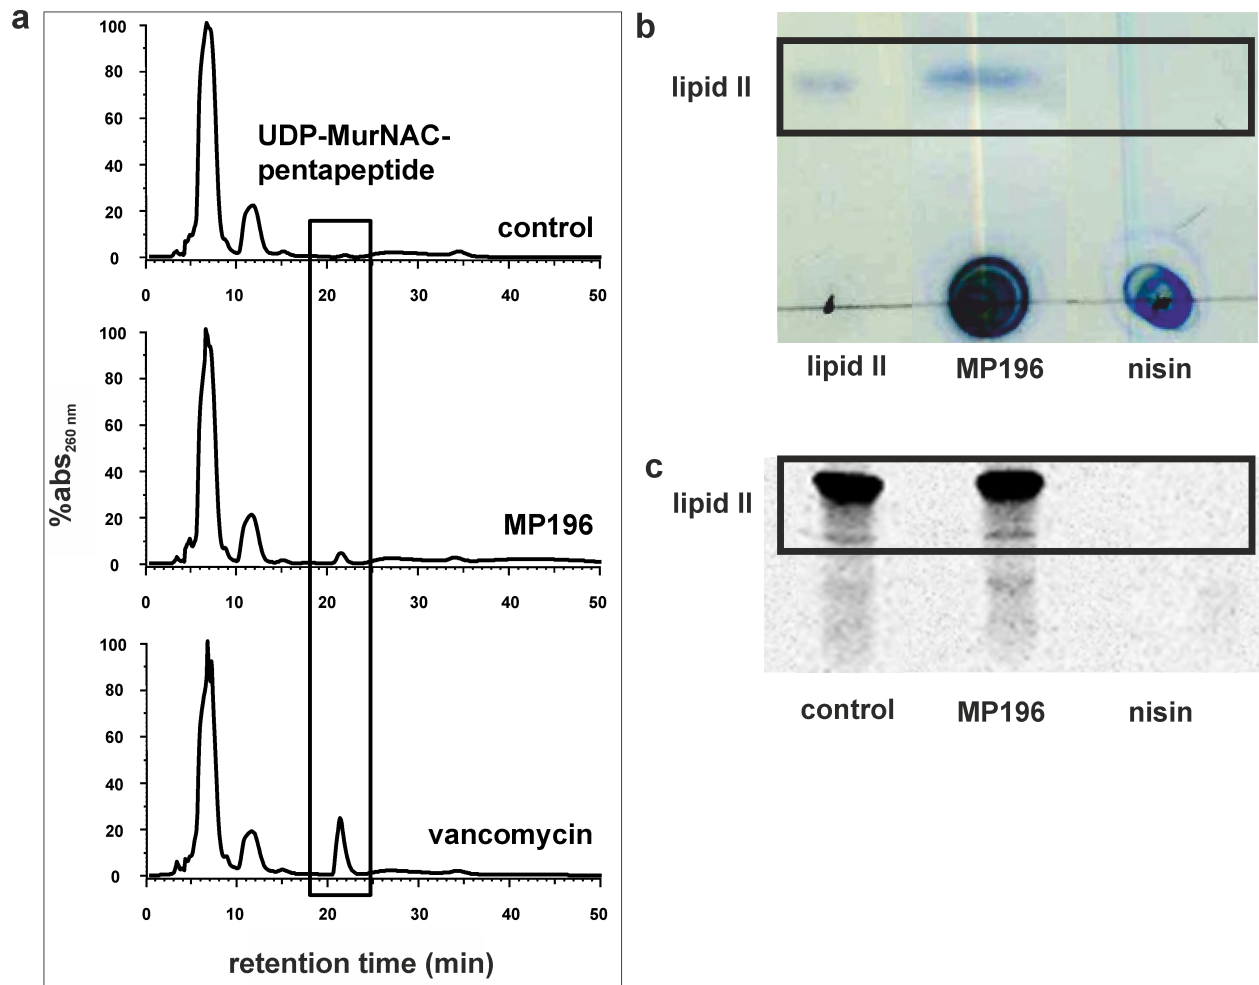

**Figure S7:** (a) HPLC chromatographs showing accumulation of the cell wall precursor UDP-MurNac pentapeptide by *S. aureus* cultures treated with MP196 and vancomycin. (b) TLC showing *in vitro* binding capability of MP196 and nisin to lipid II. (c) Thin layer chromatography (TLC) of radioactively labeled lipid II showing influence of MP196 and nisin on *in vitro* lipid II synthesis.

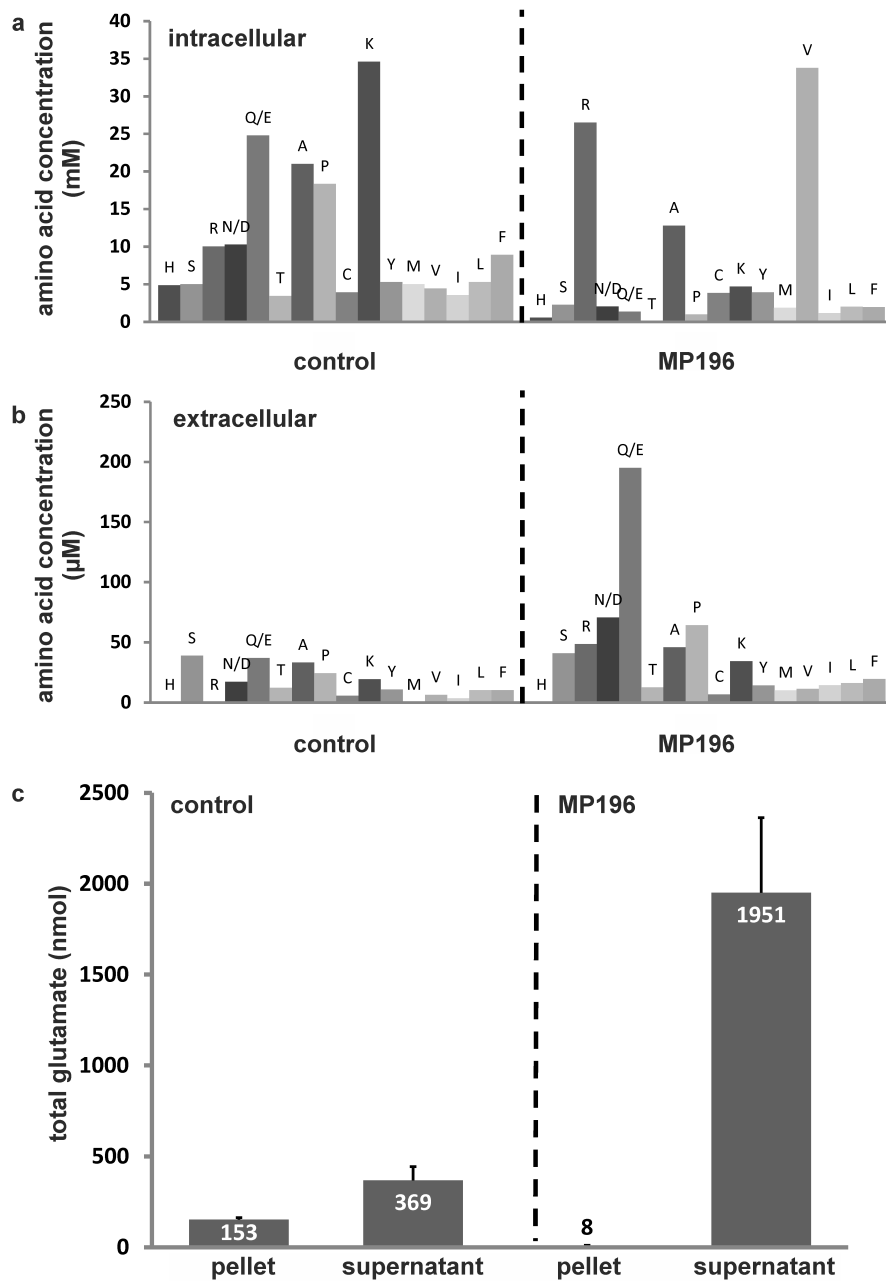

**Figure S8:** Free amino acid profiles of *B. subtilis* after MP196-treatment determined by HPLC: **(a)** intracellular amino acid concentrations **(b)** extracellular amino acid concentrations. Amino acids are written in one letter code in the order of elution time from the column. Glutamate and glutamine as well as aspartate and asparagine are not separated and appear as one peak. Tryptophan was not quantified here. **(c)** Total glutamate determination: *B. subtilis* were harvested from 10 ml of an exponentially growing culture. The cells were resuspended in AAA buffer and treated with MP196 or left untreated. After 15 min, cells were harvested by centrifugation and the total amounts of glutamate determined in the *B. subtilis* cell pellet and in the supernatant.

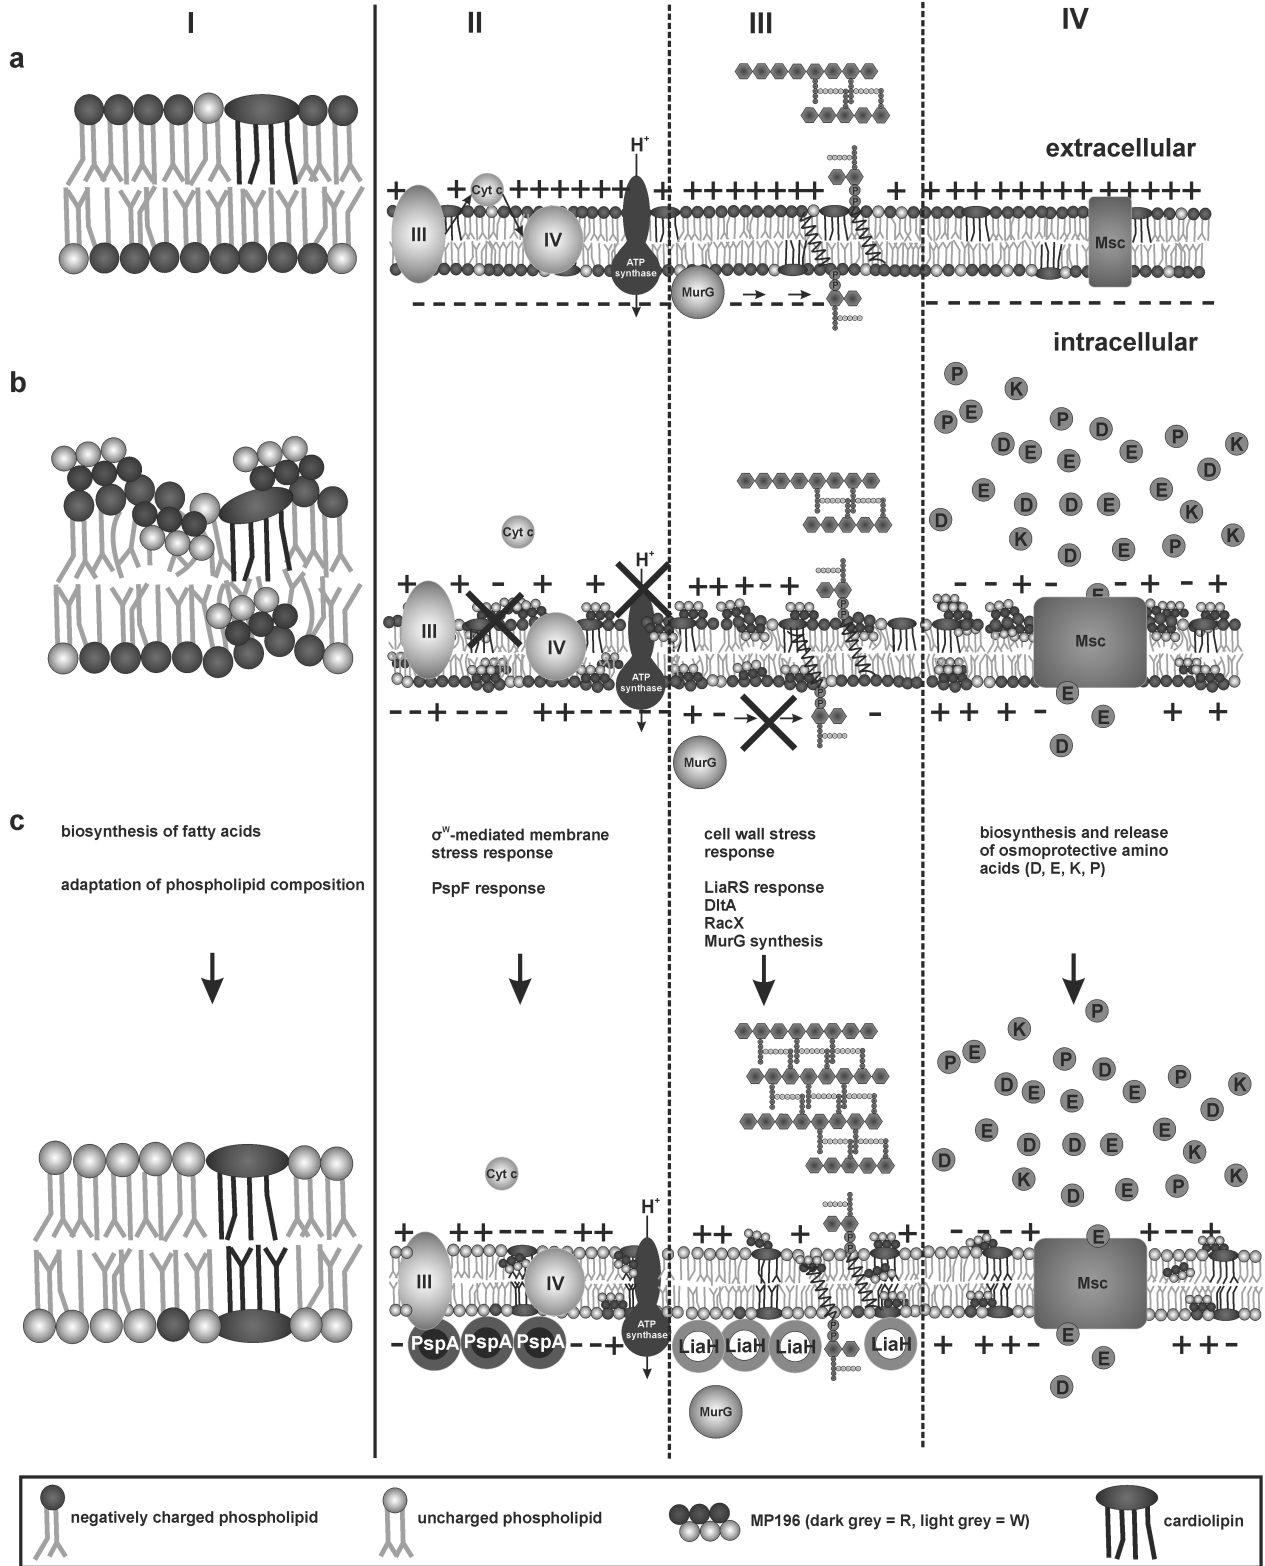

**Figure S9: Model of the mechanism of action of MP196 and the bacterial response to exposure.** Model of changes to membrane structure **(I)**. Membrane harboring the respiratory chain **(II)**, the cell wall biosynthesis machinery **(III)**, and mechanosensitive channels **(IV)**. **(a)** Intact *B. subtilis* membrane, **(b)** influence of MP196 on membrane architecture and membrane-associated components, **(c)** stress adaptation of *B. subtilis* to MP196-mediated membrane stress. Msc: mechanosensitive channel
